# Supplementary material
Source: PubMed Central journal article supplement (PMC3562374)
Supplement: NIHMS429285-supplement-3_si_003.pdf [file NIHMS429285-supplement-3_si_003.pdf]

### **Supplemental Figure 3.**

MS/MS *de novo* sequencing of neuropeptides detected in ESI experiments.

PepSeq software was used to process *de novo* data.

---

MS/MS *de novo* sequences of peptides in table 1 (pg 2 – 33)

MS/MS of CPRP ( $[M+1]^+ = 3837$ ) (pg 34 – 35)

AST-A DPYAFGLa ( $m/z$  781.3879)

MS/MS of  $m/z$  391.19<sup>+2</sup> (PepSeq score = 44)

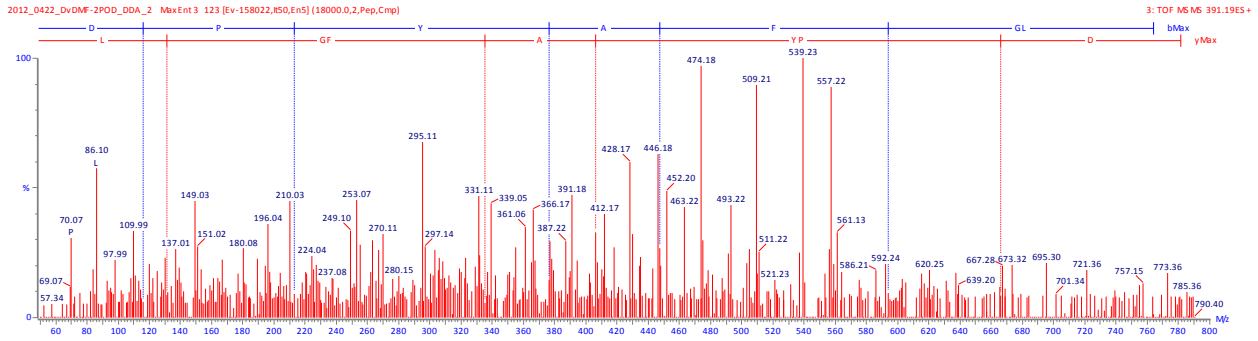

AST-A DGPYSFGLa ( $m/z$  854.4458)

MS/MS of  $m/z$  427.72<sup>+2</sup> (PepSeq score = 20)

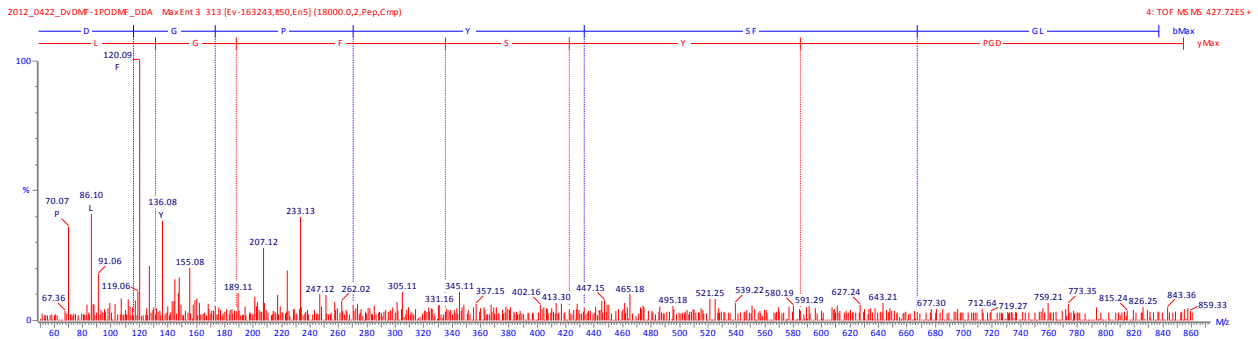

AST-A SNPYSFGLa ( $m/z$  883.4308)

MS/MS of  $m/z$  442.62<sup>+2</sup> (PepSeq score = 19)

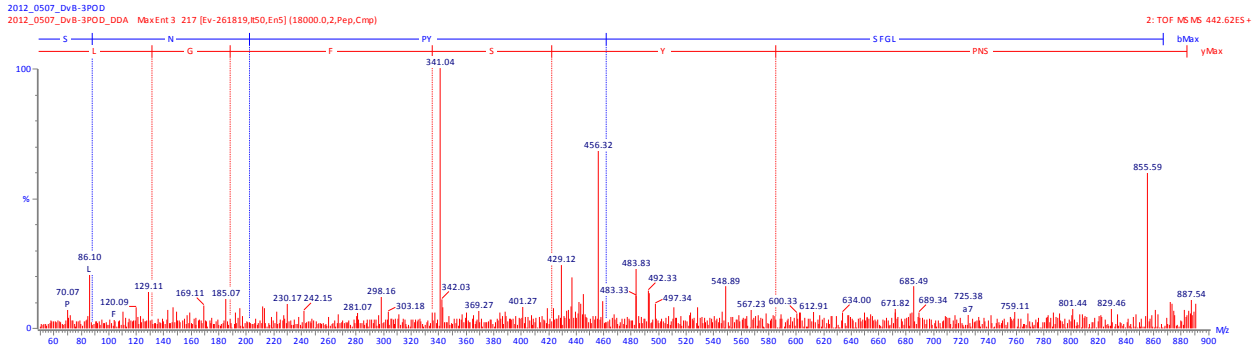

AST-A ARGYDFGLa ( $m/z$  897.4577)

MS/MS of  $m/z$  449.28<sup>+</sup> (PepSeq score = 63)

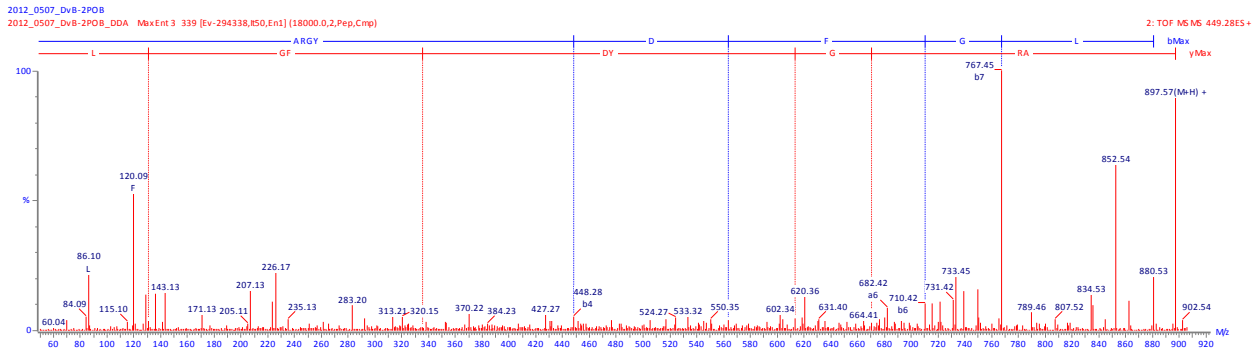

AST-A ARPYSFGLa ( $m/z$  909.4941)

MS/MS of  $m/z$  455.29<sup>+</sup> (PepSeq score = 28)

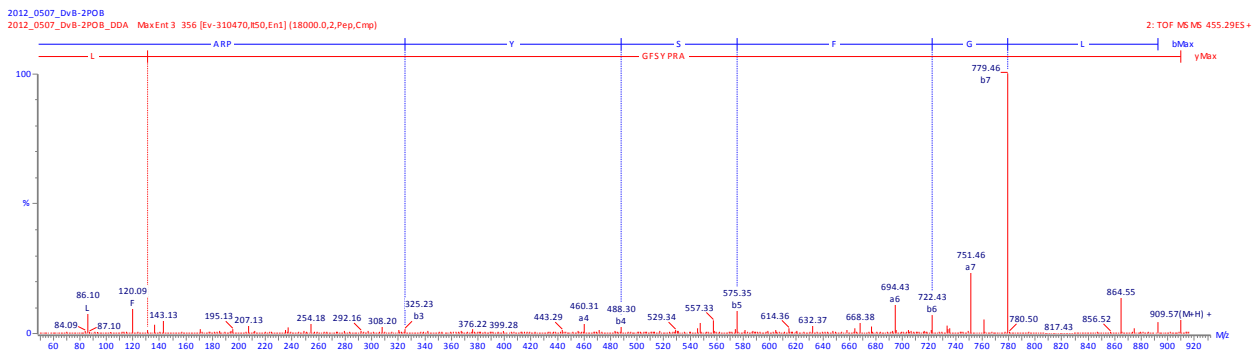

AST-A ARAYDFGLa ( $m/z$  911.4734)

MS/MS of  $m/z$  456.22<sup>+</sup> (PepSeq score = 21)

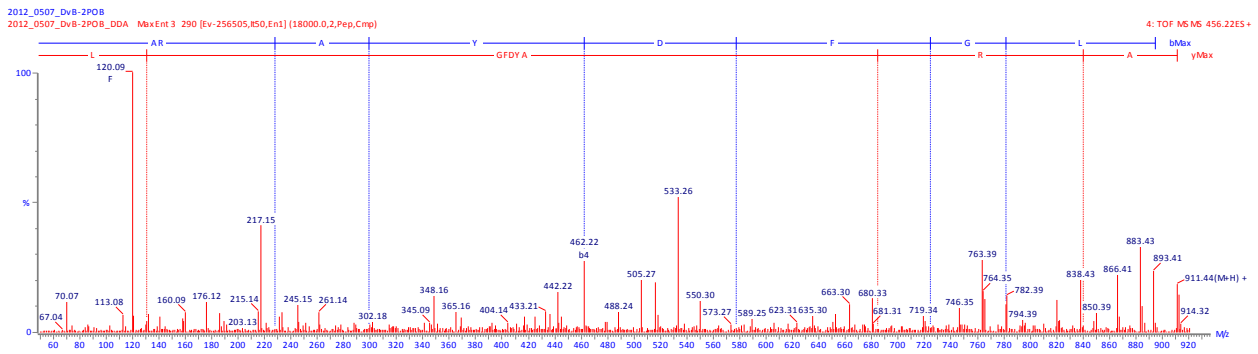

AST-A SSGQYAFGLa ( $m/z$  928.4523)

MS/MS of  $m/z$  464.73<sup>+2</sup> (PepSeq score =4)

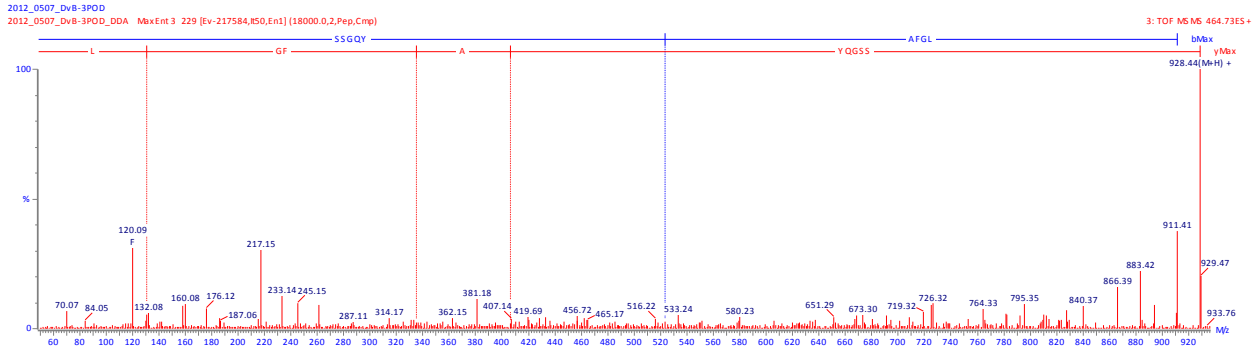

AST-A PRVYSFGLa ( $m/z$  937.5254)

MS/MS of  $m/z$  469.31<sup>+2</sup> (PepSeq score = 52)

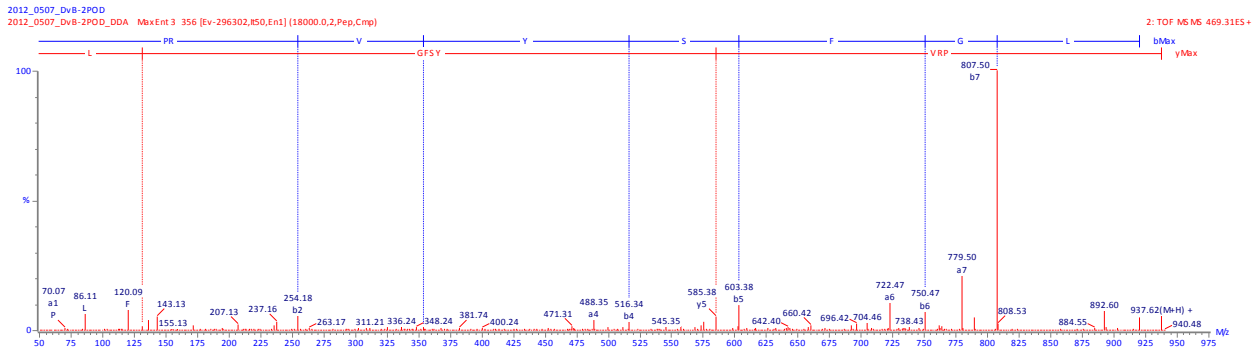

AST-A TRPYSFGLa ( $m/z$  939.5047)

MS/MS of  $m/z$  470.23<sup>+2</sup> (PepSeq score = 7)

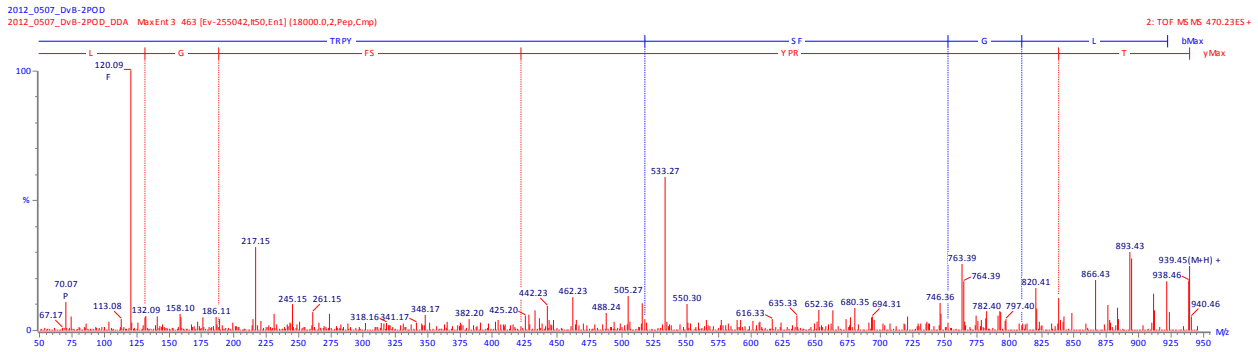

AST-A APQPYAFGLa ( $m/z$  962.5094)

MS/MS of  $m/z$  455.29<sup>+2</sup> (PepSeq score = 11)

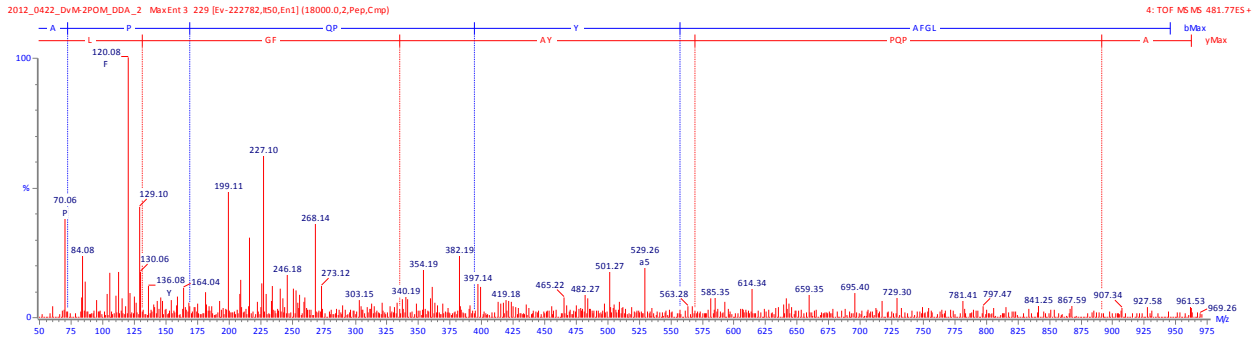

AST-A TSPQYSFGLa ( $m/z$  998.4942)

MS/MS of  $m/z$  499.75<sup>+2</sup> (PepSeq score = 8)

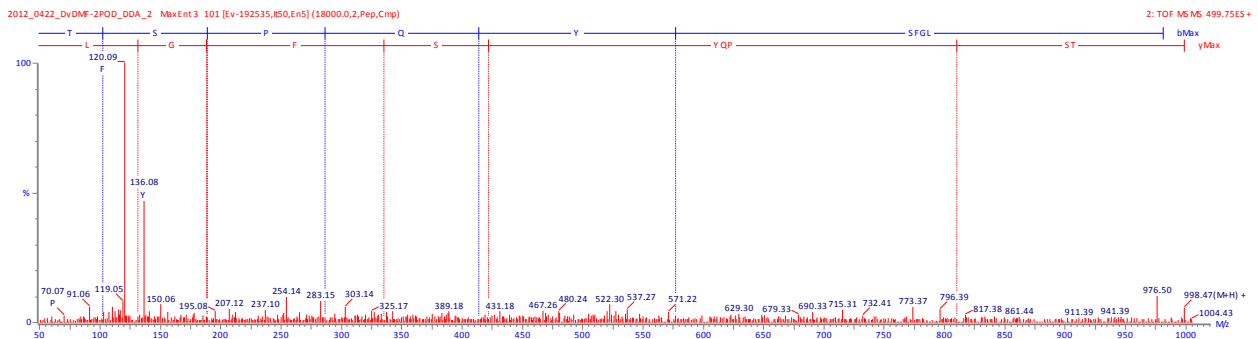

AST-A FSGTYNFGLa ( $m/z$  1004.4836)

MS/MS of  $m/z$  502.76<sup>+2</sup> (PepSeq score = 108)

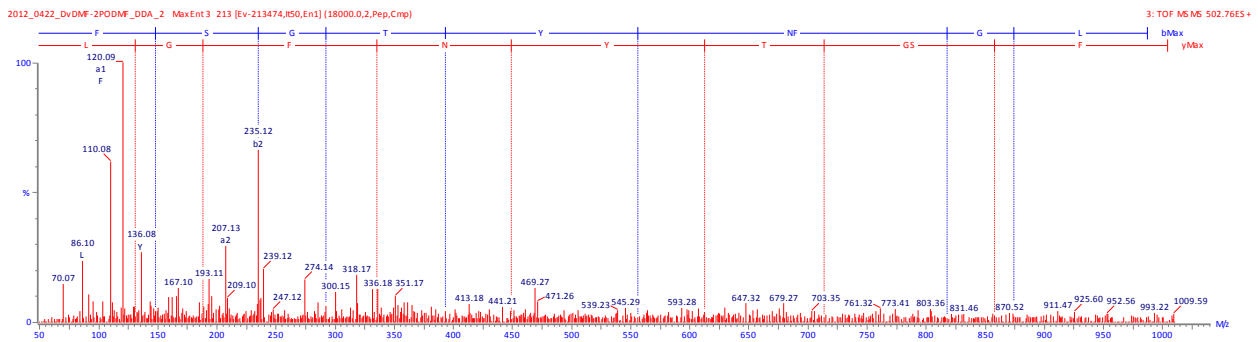

AST-A THPTYSFGLa ( $m/z$  1021.5102)

MS/MS of  $m/z$  511.28<sup>+2</sup> (PepSeq score = 87)

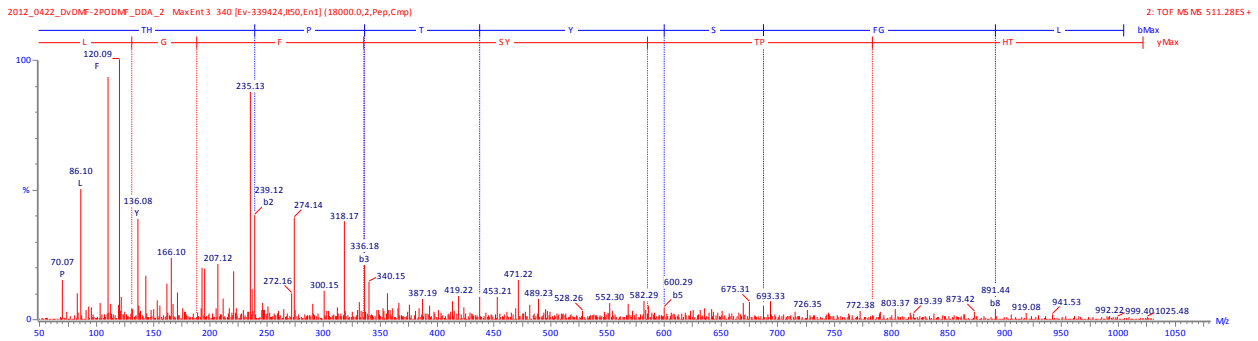

AST-A AGLSALYSFGLa ( $m/z$  1097.5990)

MS/MS of  $m/z$  549.30<sup>+2</sup> (PepSeq score = 180)

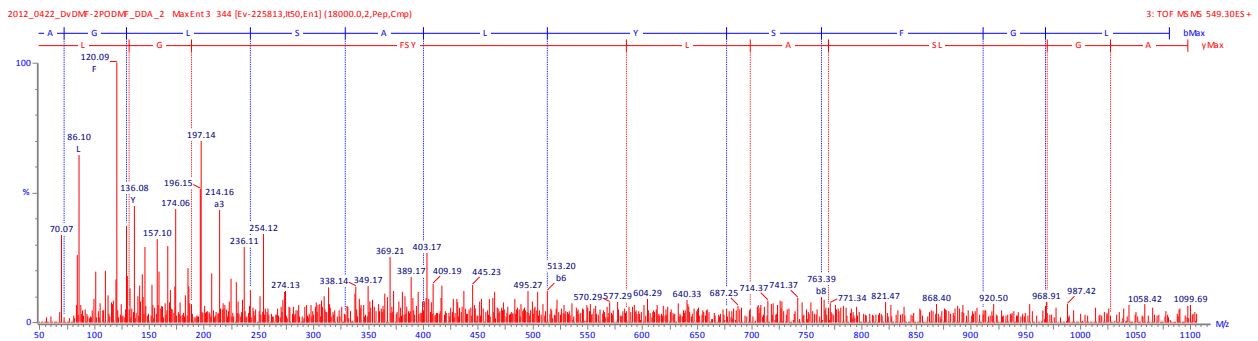

AST-A AAGLQNYDFGLa ( $m/z$  1167.5793)

MS/MS of  $m/z$  584.32<sup>+2</sup> (PepSeq score = 127)

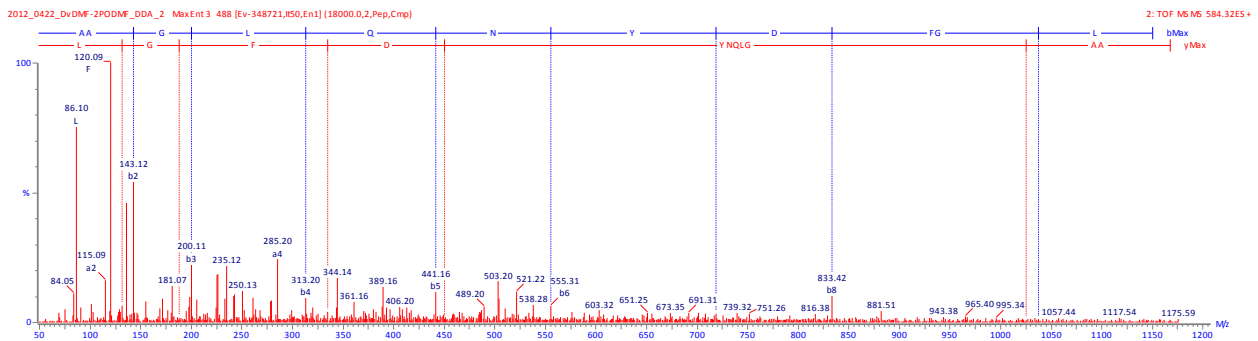

AST-A GSGQYAYGLGKKAGQYSFGLa (*m/z* 2051.0345)

MS/MS of *m/z* 1028.05<sup>+2</sup> (PepSeq score = 302)

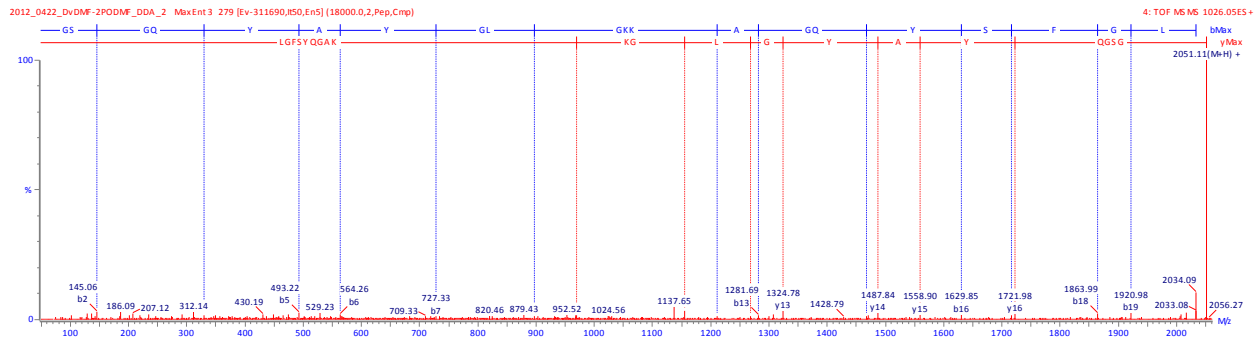

AST-B AWSNLQGAWa ( $m/z$  1031.5057)

MS/MS of  $m/z$  516.30 (PepSeq score = 54)

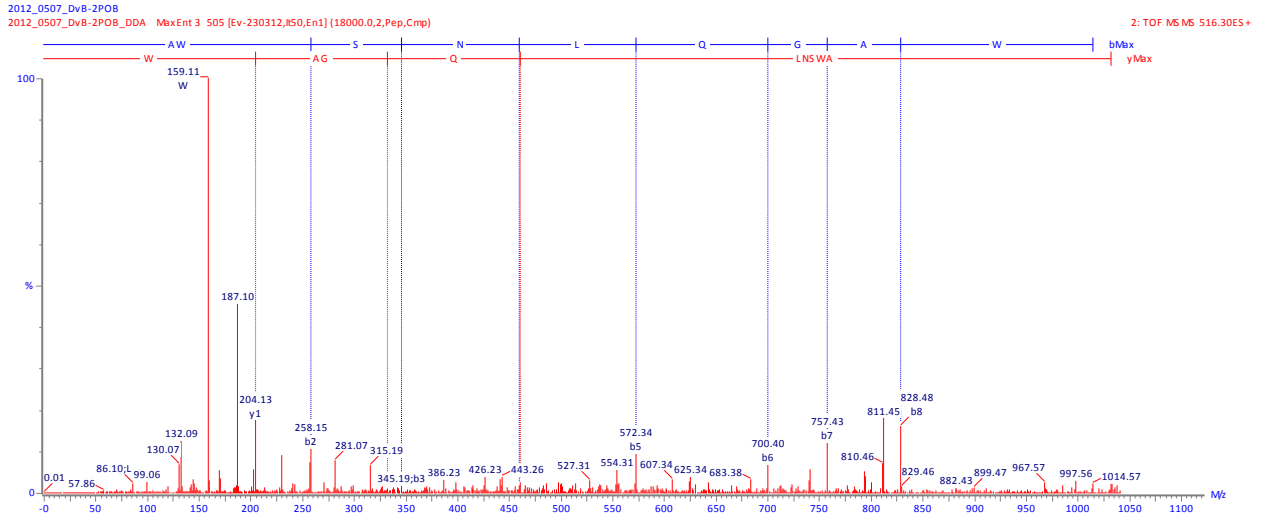

AST-B AGWSSLKGAWa ( $m/z$  1061.5527)

MS/MS of  $m/z$  531.28 (PepSeq score = 98)

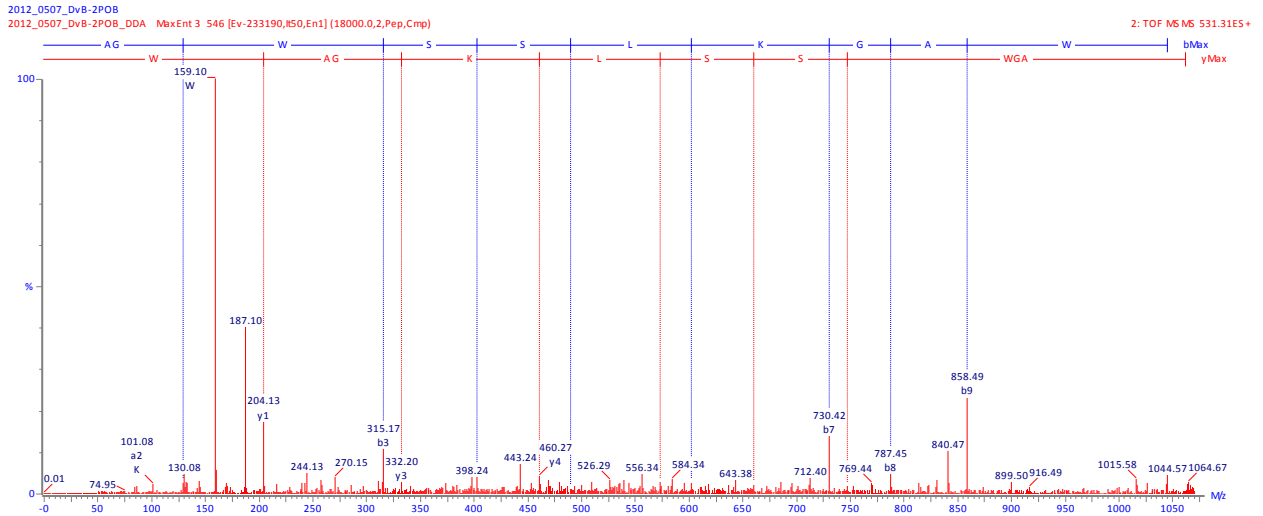



### AST-B AGWSSMRGAWa ( $m/z$ 1107.5153)

#### MS/MS of $m/z$ 554.26 (PepSeq score = 225)

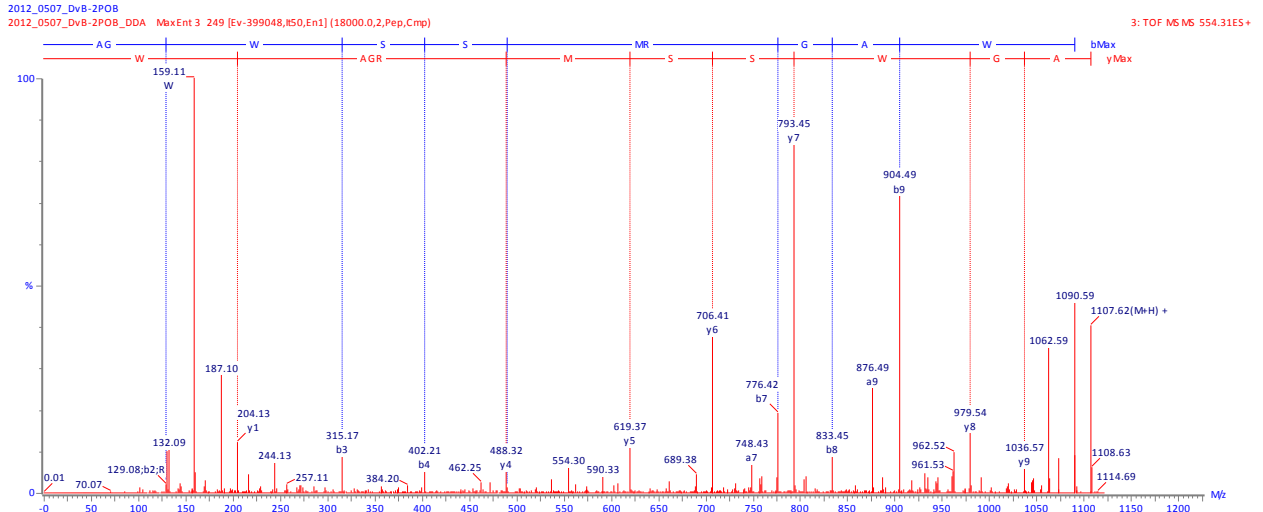

### AST-B AGWSSM(O)RGAWa ( $m/z$ 1123.5102)

#### MS/MS of $m/z$ 562.26 (PepSeq score = 119)

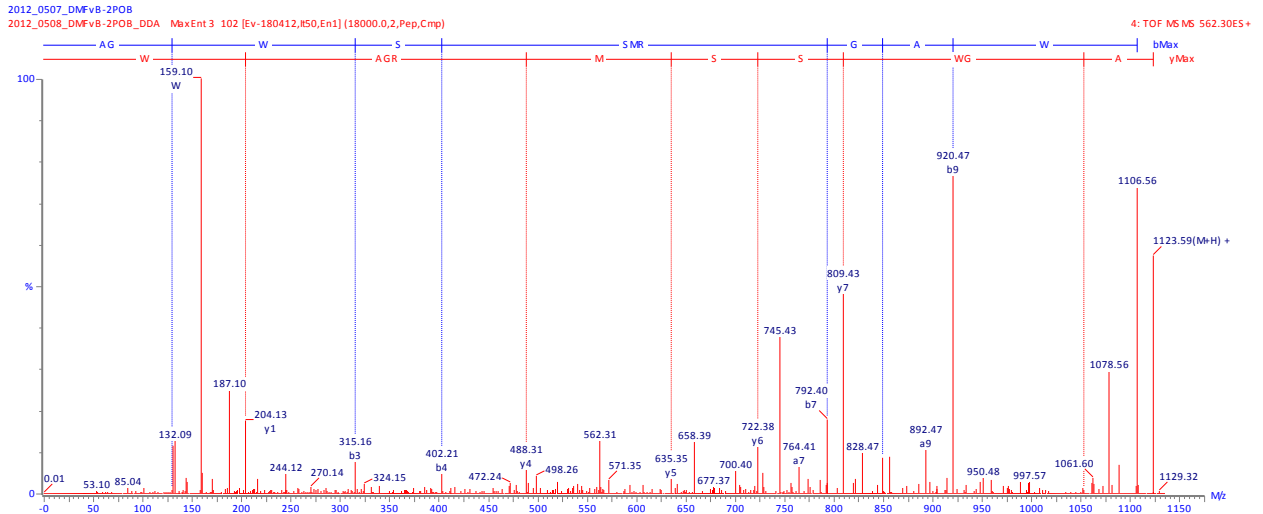

AST-B TSWGKFQGSWa ( $m/z$  1182.5691)

MS/MS of  $m/z$  591.78 (PepSeq score = 161)

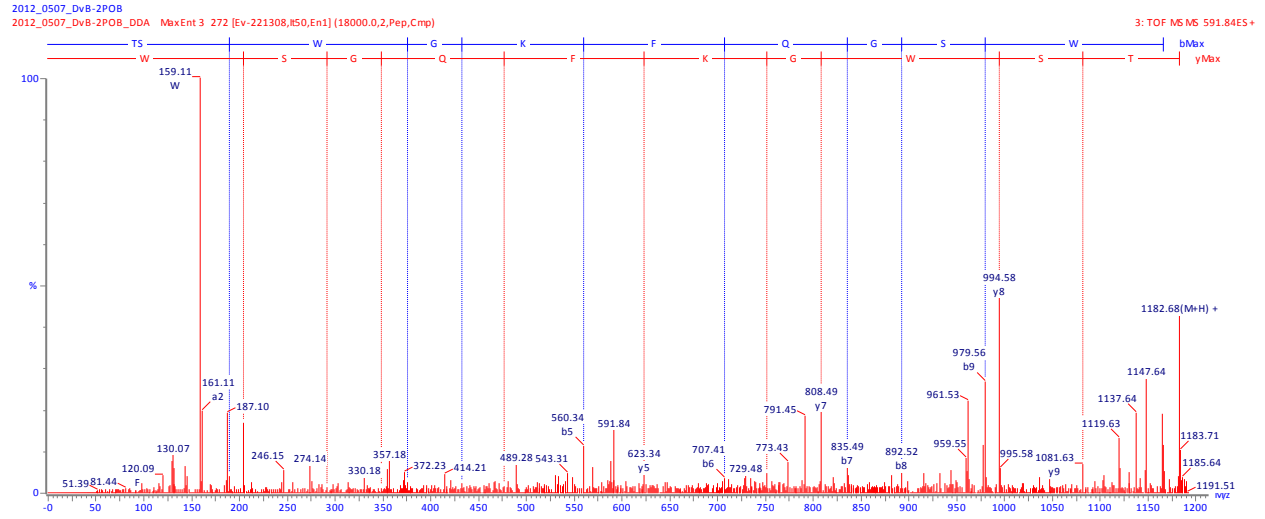

AST-B TGWNKFQGSWa ( $m/z$  1209.5800)

MS/MS of  $m/z$  605.29 (PepSeq score = 278)

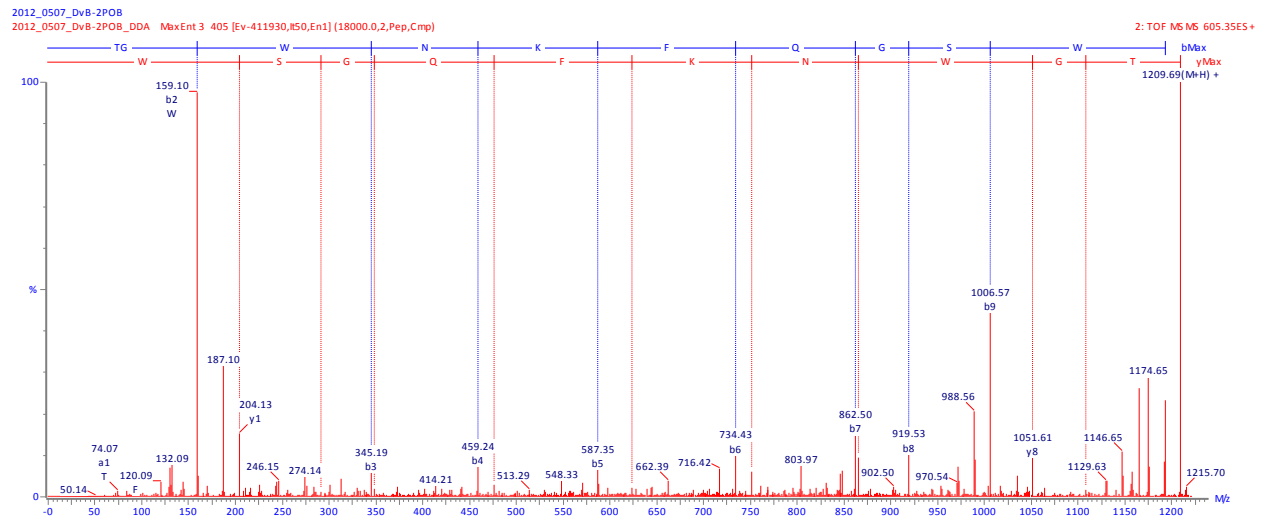

AST-B SGDWSSLRGAWa ( $m/z$  1220.5807)

MS/MS of  $m/z$  610.79 (PepSeq score = 331)

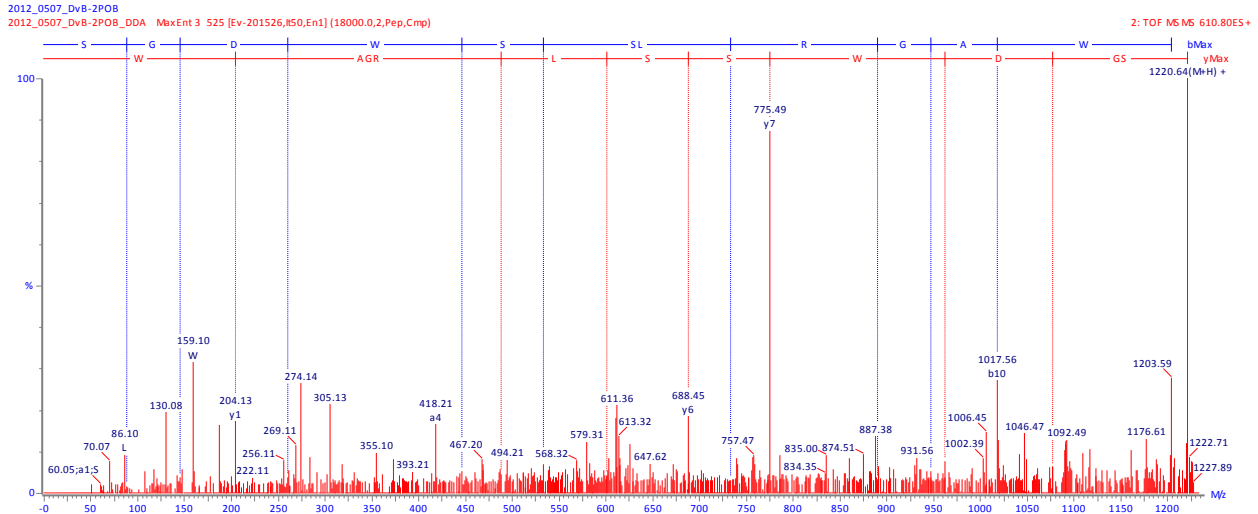

AST-B GNWNKFQGSWa ( $m/z$  1222.5752)

MS/MS of  $m/z$  611.79 (PepSeq score = 157)

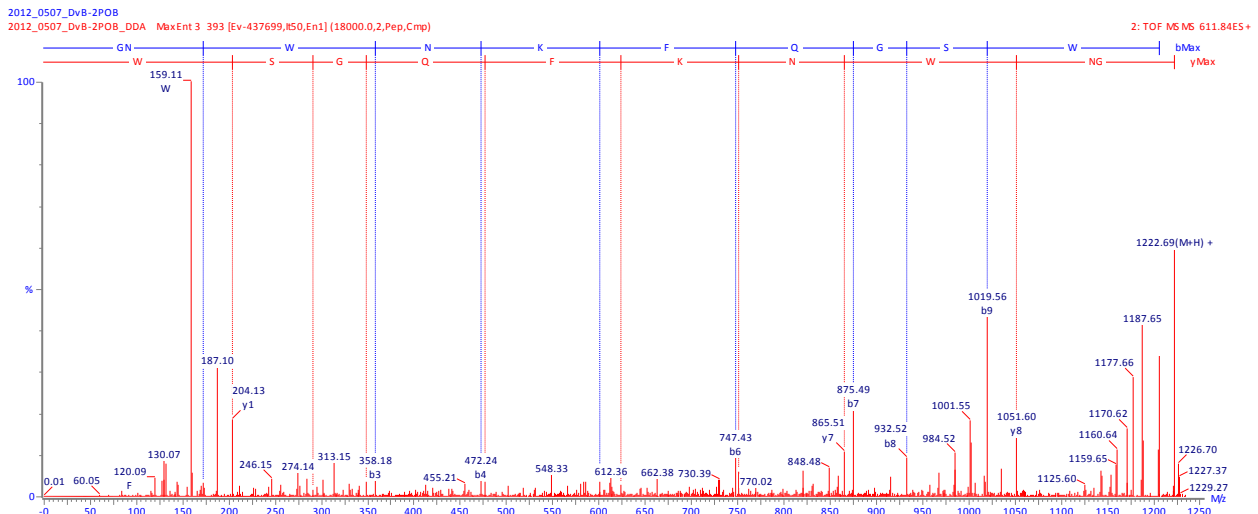

AST-B NNWSKFQGSWa ( $m/z$  1252.5858)

MS/MS of  $m/z$  626.79 (PepSeq score = 220)

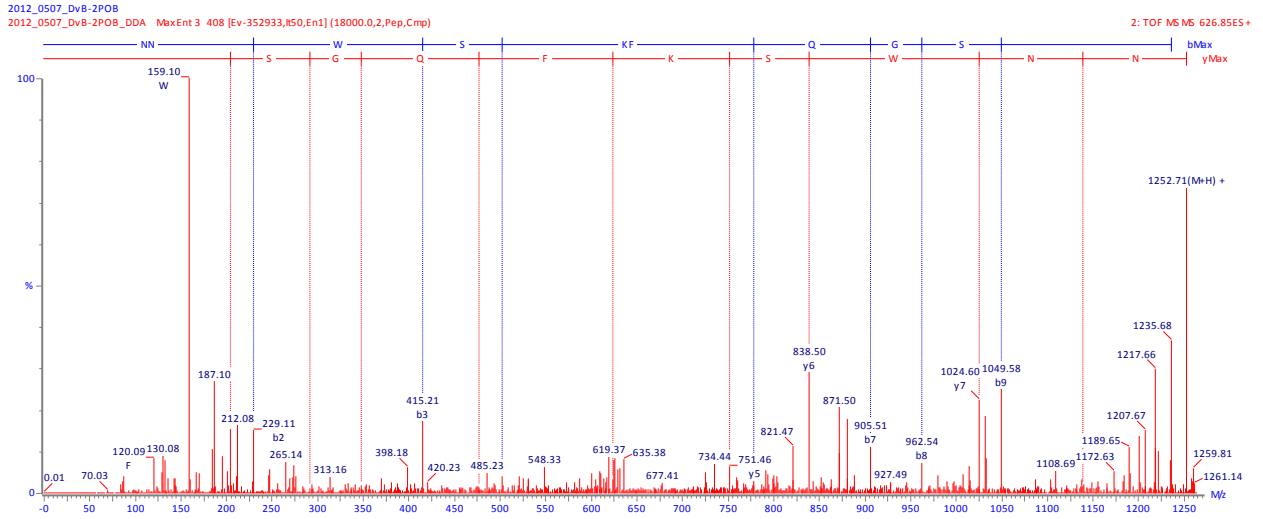

AST-B NDWSKFGQSWa ( $m/z$  1253.5698)

MS/MS of  $m/z$  627.28 (PepSeq score = 20)

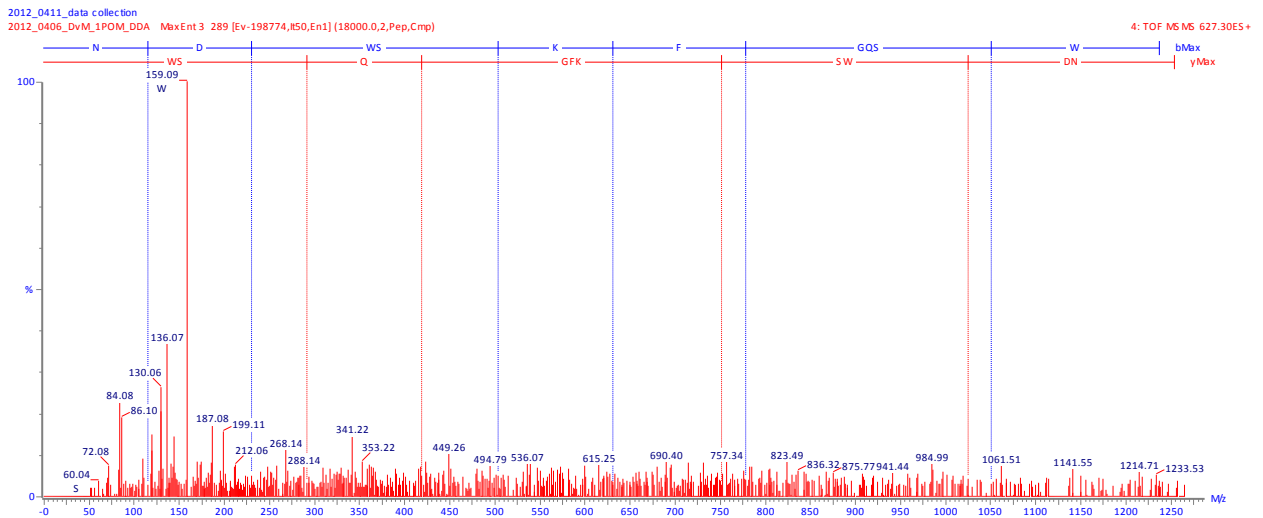

AST-B STNWSSLRSaW (m/z 1293.6335)

MS/MS of m/z 647.32 (PepSeq score = 282)

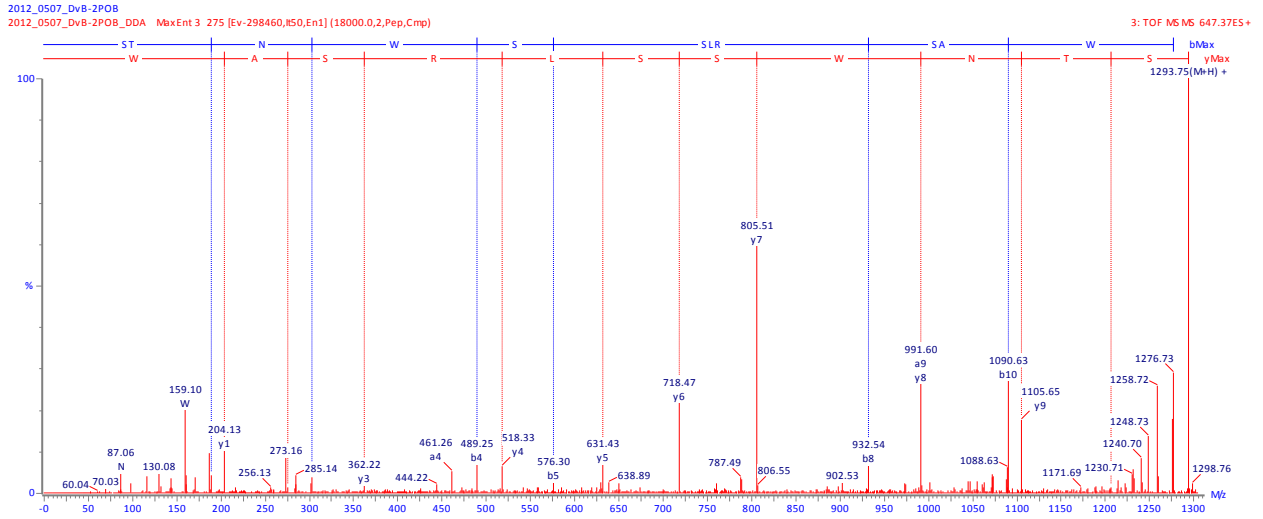

AST-B NNNWTKFQGSWa (m/z 1380.6444)

MS/MS of m/z 690.82 (PepSeq score = 329)

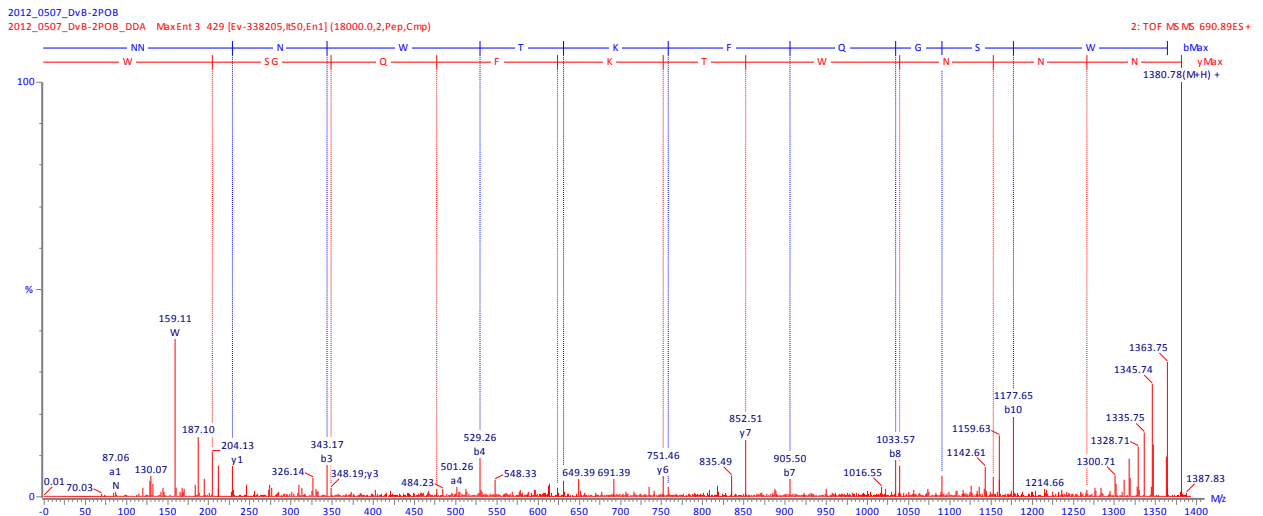

AST-B VPNDWAHFRGSWa ( $m/z$  1470.7025)

MS/MS of  $m/z$  735.85 (PepSeq score = 29)

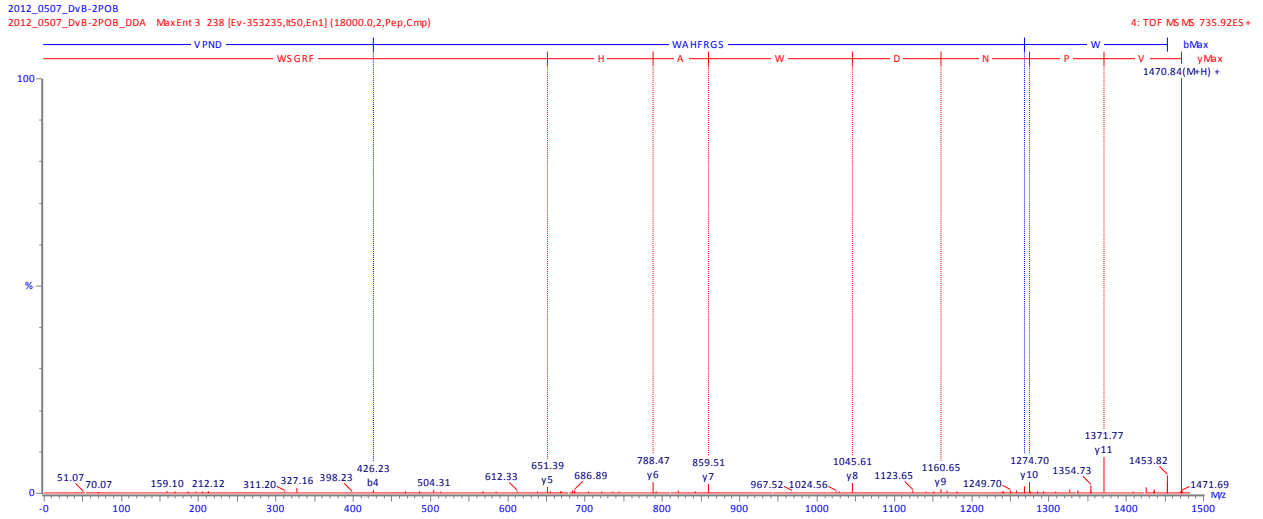

AST-B MFAPLAWPKGGARWAa ( $m/z$  1586.8413)

MS/MS of  $m/z$  793.92 (PepSeq score = 29)

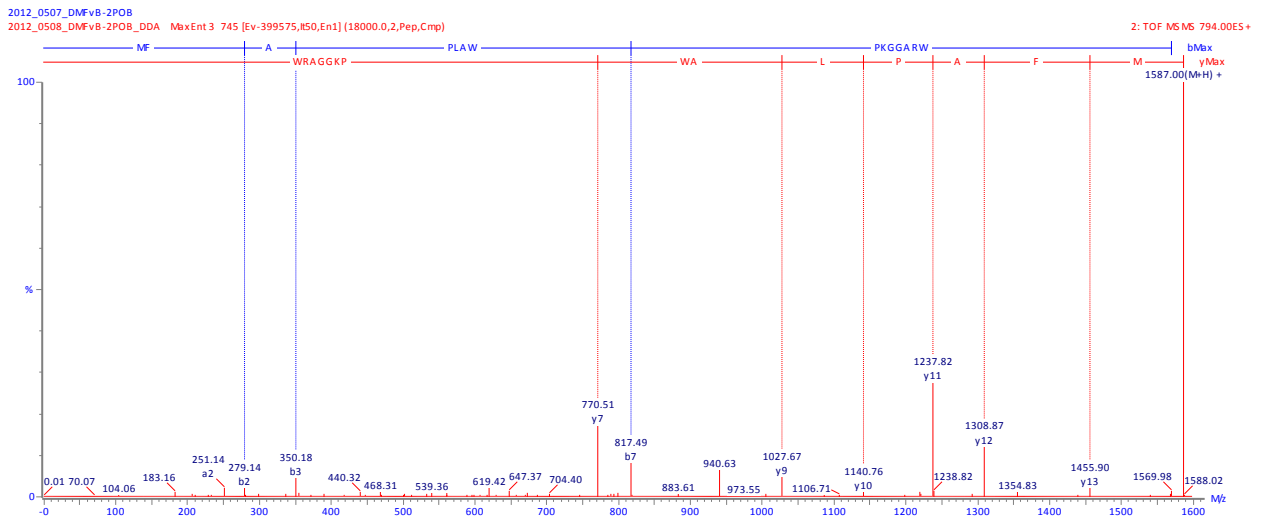

CCAP PFCNAFTGCa ( $m/z$  956.3753)

MS/MS of  $m/z$  478.69 (PepSeq score = 63)

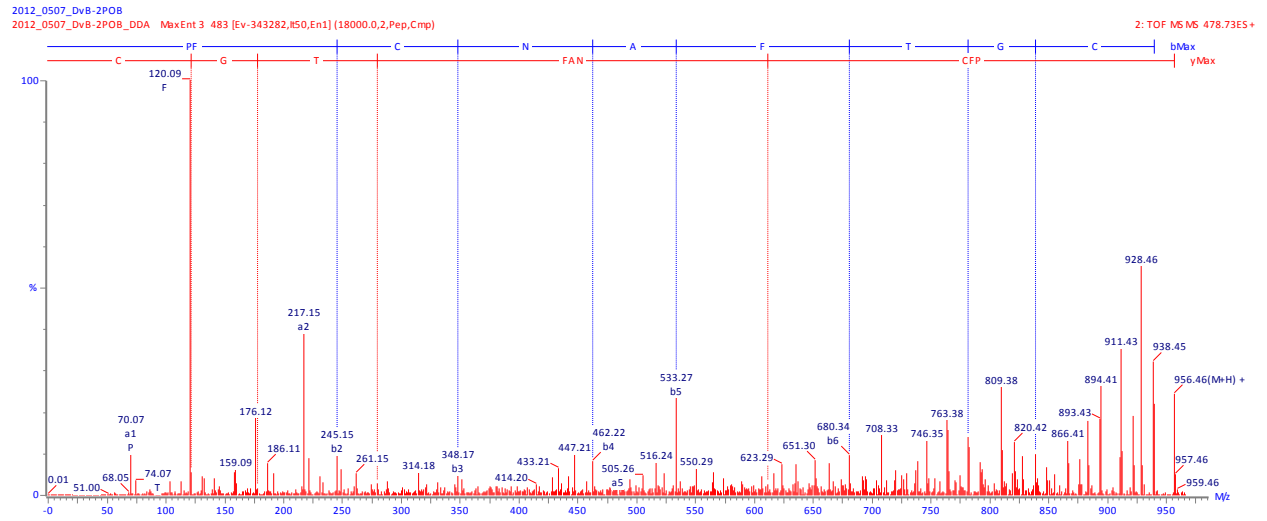

FLP-SKNYLRF (m/z 926.5207)

MS/MS of m/z 463.80<sup>2+</sup> (PepSeq score = 62)

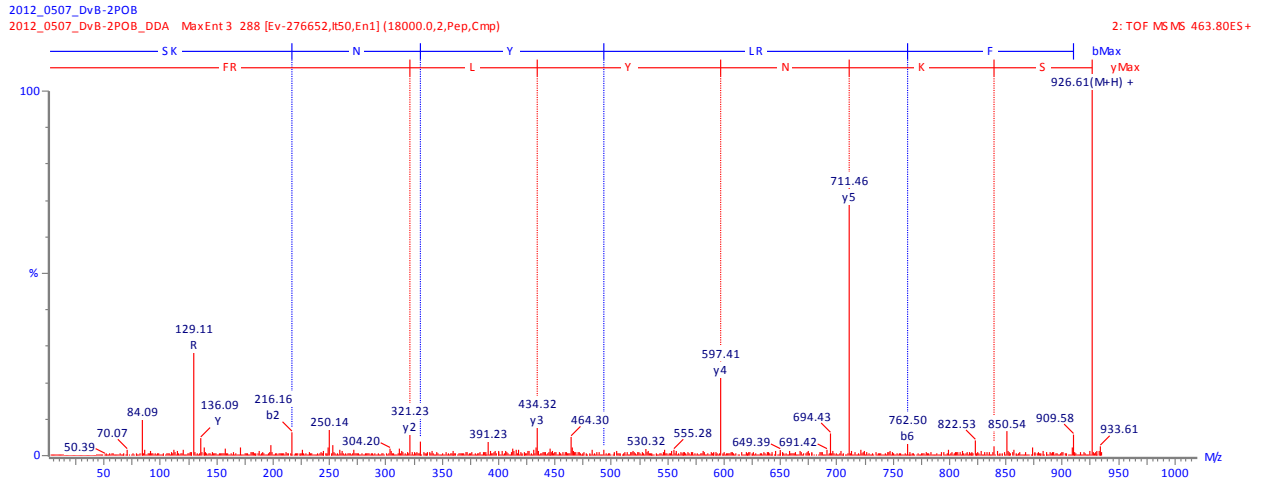

FLP-NRNFLRFa (m/z 965.5428)

MS/MS of m/z 483.31<sup>2+</sup> (PepSeq score = 53)

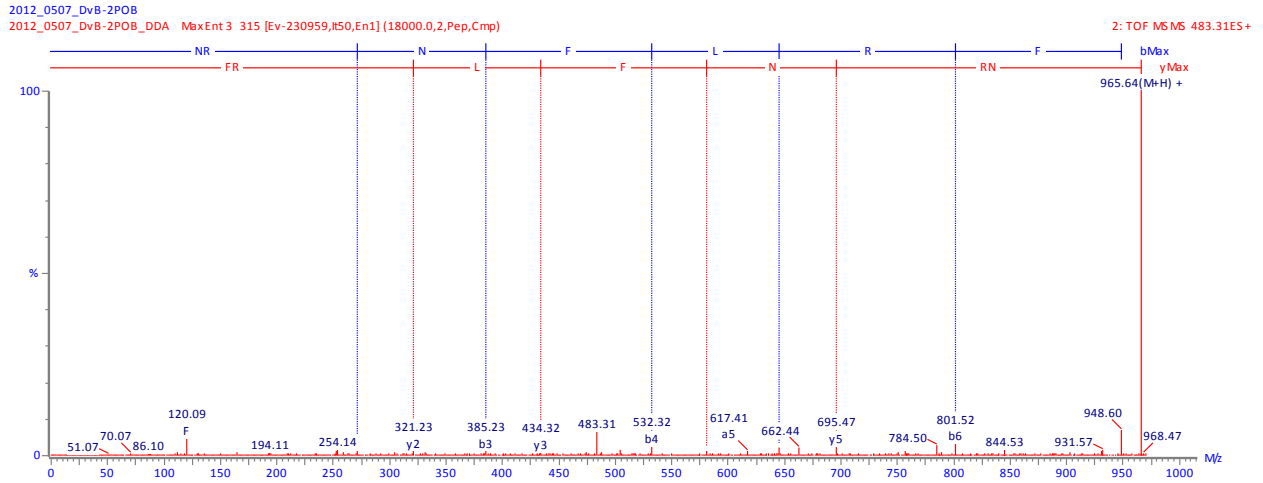



FLP-DRNFLRFa ( $m/z$  966.5268)

MS/MS of  $m/z$  483.78<sup>2+</sup> (PepSeq score = 135)

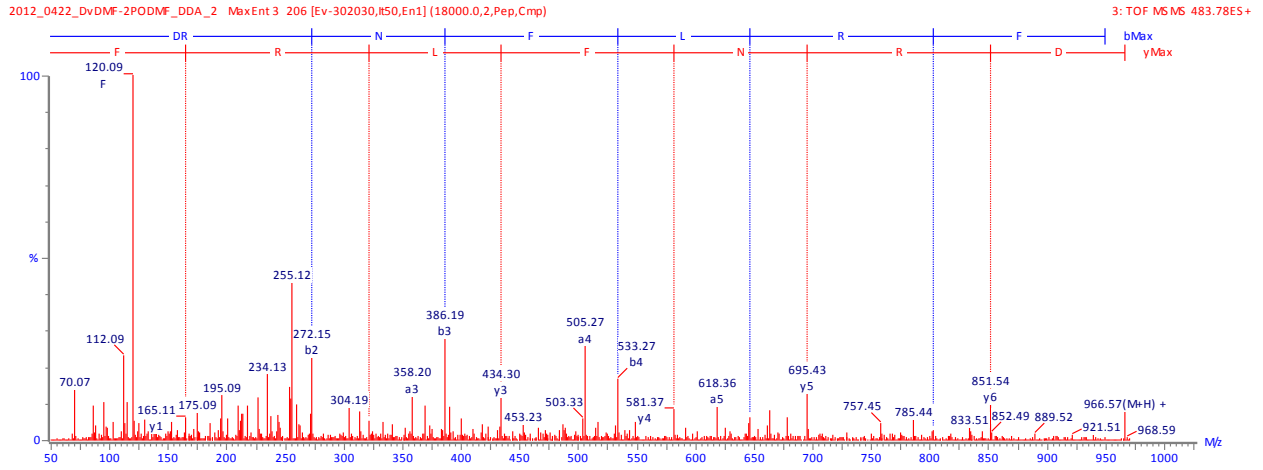

FLP-GAHKNYLRFa ( $m/z$  1104.6061)

MS/MS of  $m/z$  552.83<sup>2+</sup> (PepSeq score = 132)

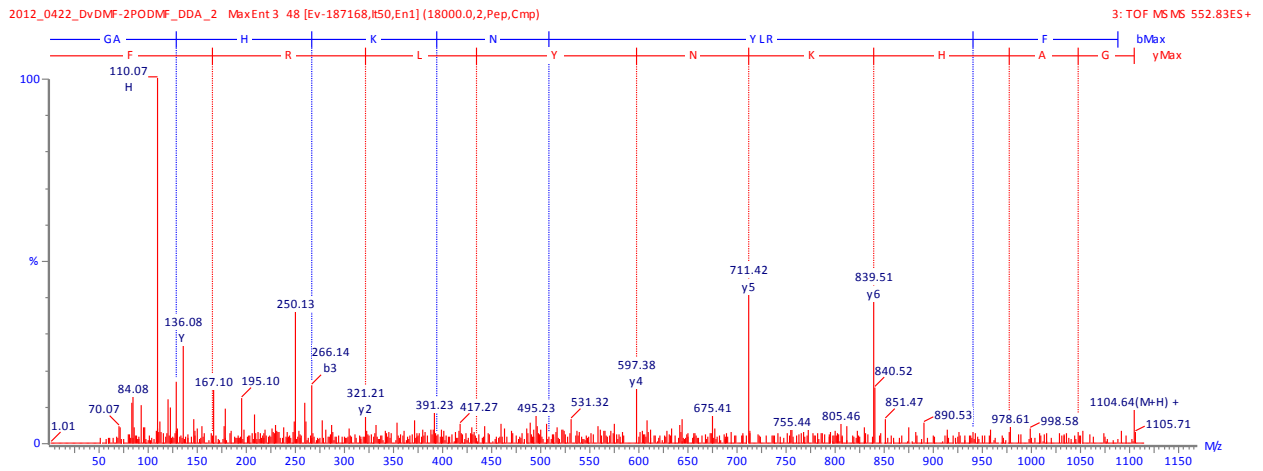

FLP-GLSRNYLRFa ( $m/z$  1124.6323)

MS/MS of  $m/z$  562.82<sup>2+</sup> (PepSeq score = 47)

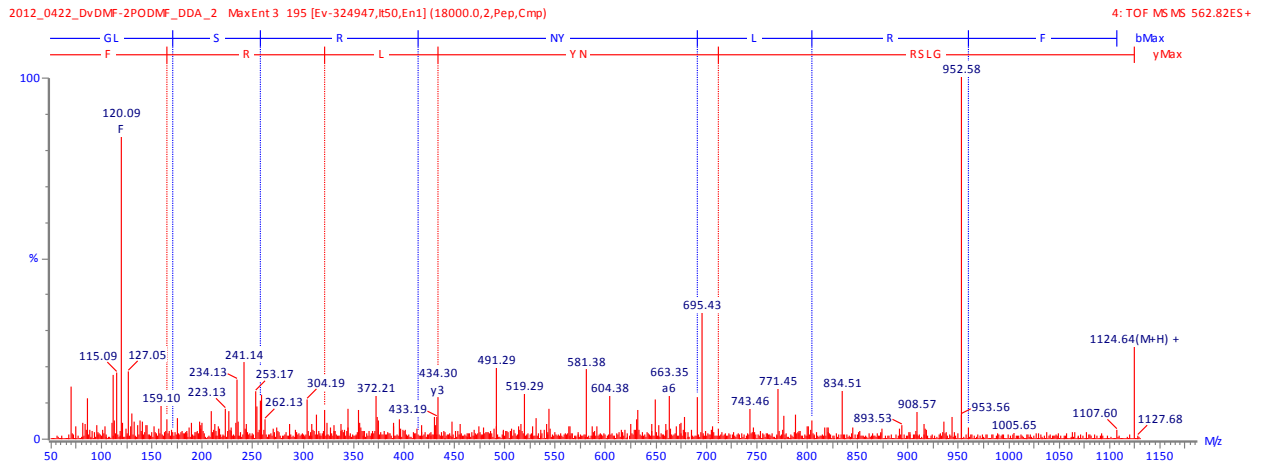

FLP-GYSKNYLRFa ( $m/z$  1146.6055)

MS/MS of  $m/z$  573.82<sup>2+</sup> (PepSeq score = 73)

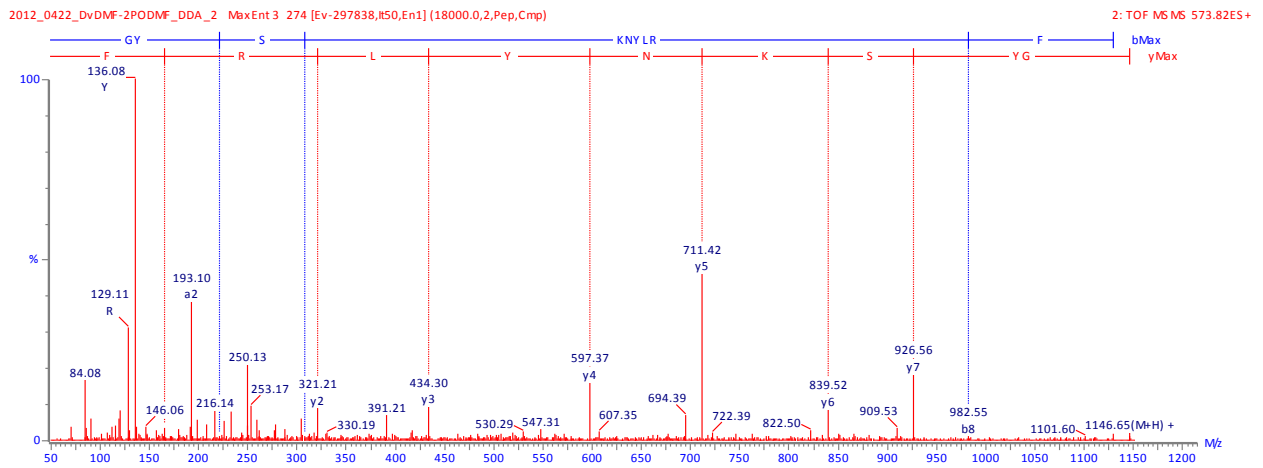

FLP-APQRNFLRFa ( $m/z$  1147.6483)

MS/MS of  $m/z$  574.3242<sup>2+</sup> (PepSeq score = 259)

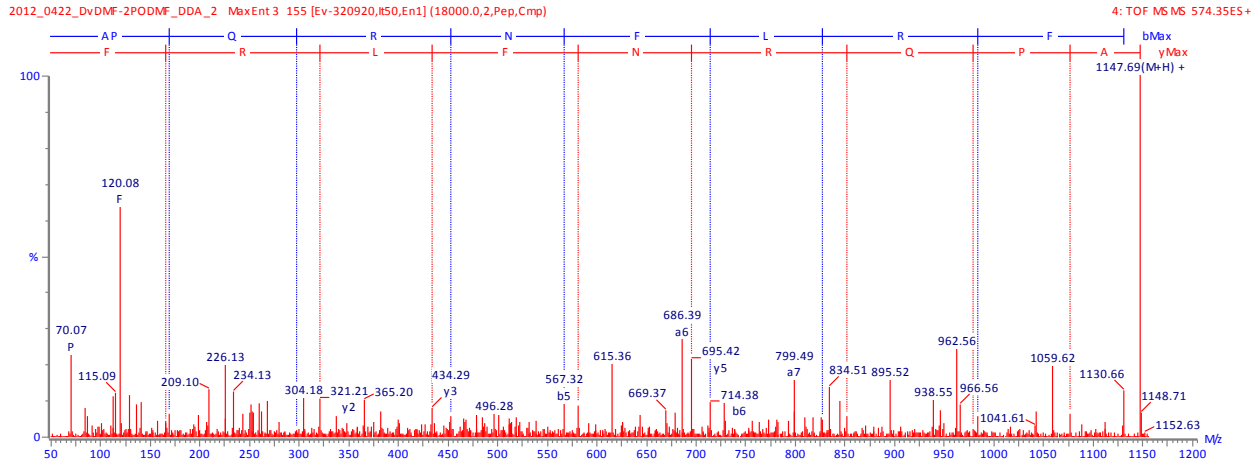

FLP-YGNRSFLRFa ( $m/z$  1158.6167)

MS/MS of  $m/z$  579.82<sup>2+</sup> (PepSeq score = 142)

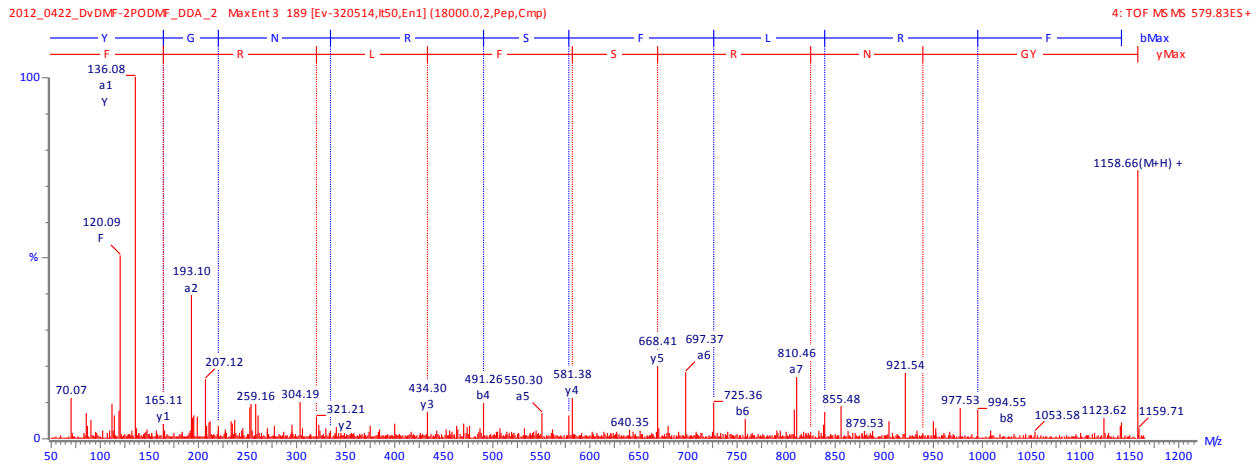

### Myosuppressin pQLDHSVFLR ( $m/z$ 1125.5687)

MS/MS of  $m/z$  563.31 (PepSeq score = 434)

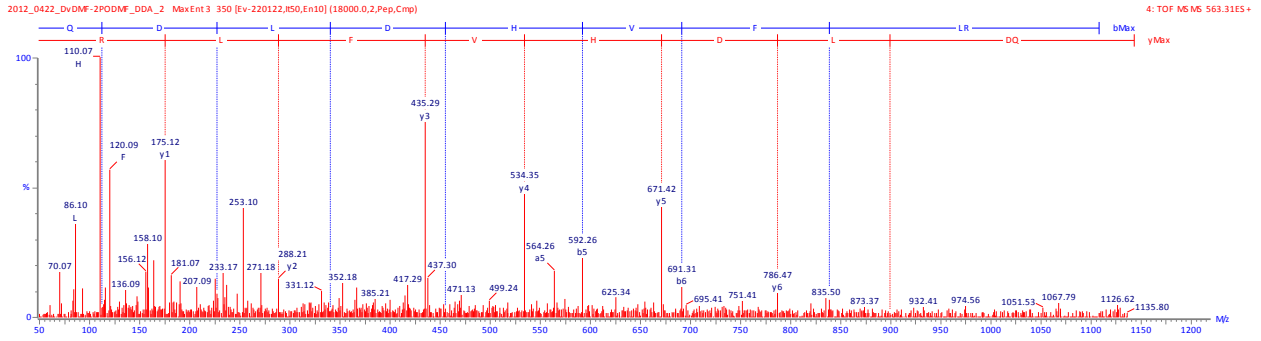

### Myosuppressin pQLDHSVFLRFa ( $m/z$ 1271.6531)

MS/MS of  $m/z$  636.35 (PepSeq score = 213)

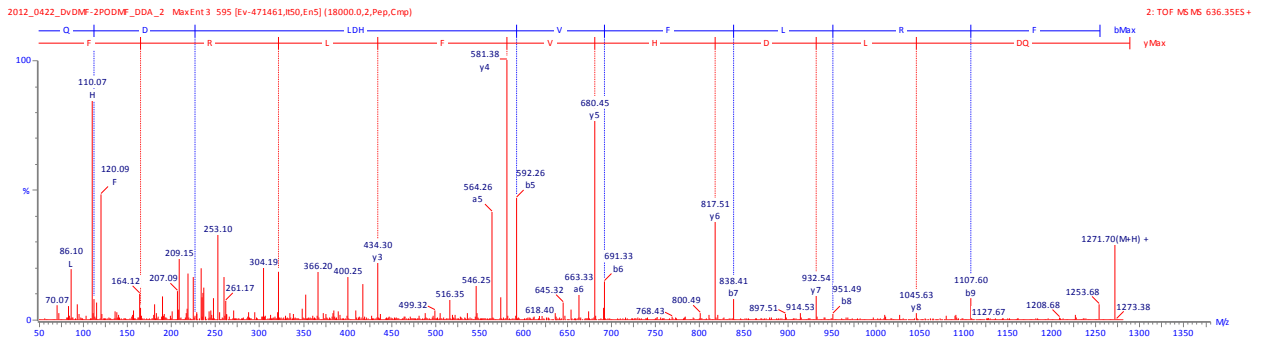

### Myosuppressin QLDHVFLRFa ( $m/z$ 1288.6797)

MS/MS of  $m/z$  430.27 (PepSeq score = 581)

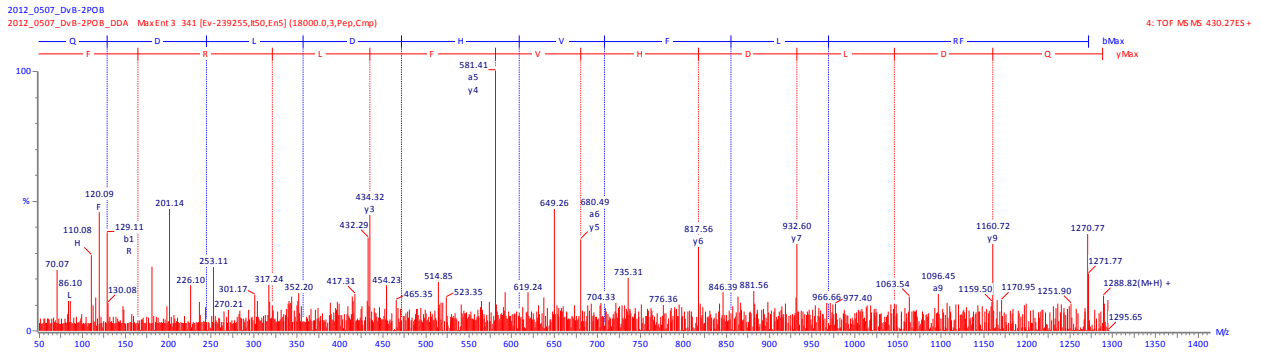

Orcomyotropin FDAFTTGFHGS ( $m/z$  1186.5164)

MS/MS of  $m/z$  593.81 (PepSeq score = 623)

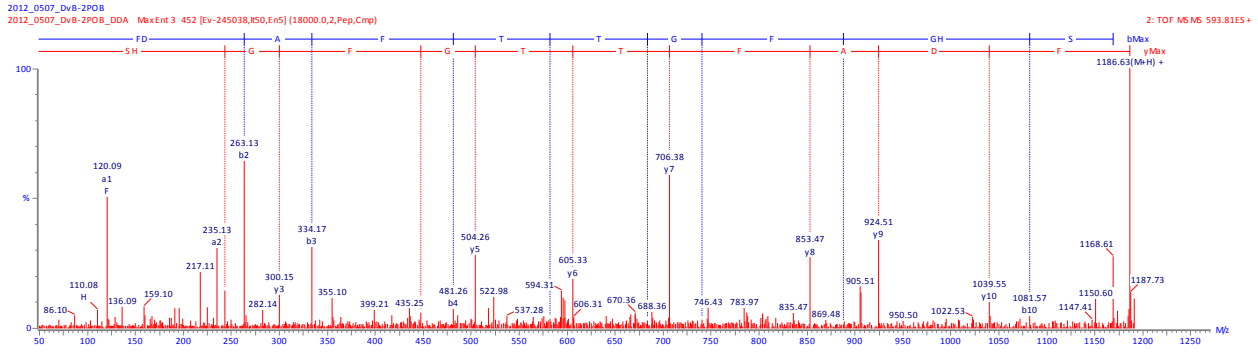

Orcokinin NFDEIDRSSFa ( $m/z$  1228.5593)

MS/MS of  $m/z$  614.80 (PepSeq score = 171)

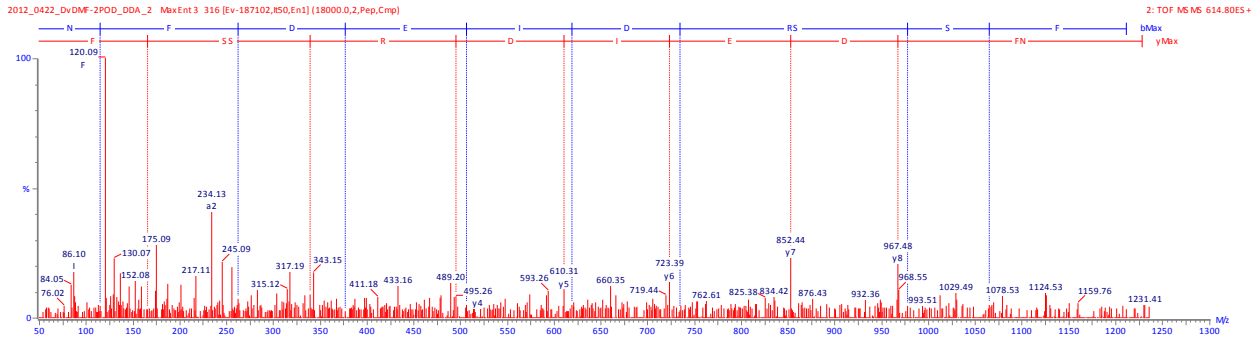

Orcokinin NFDEIDRSGFA ( $m/z$  1270.5699)

MS/MS of  $m/z$  635.82 (PepSeq score = 21)

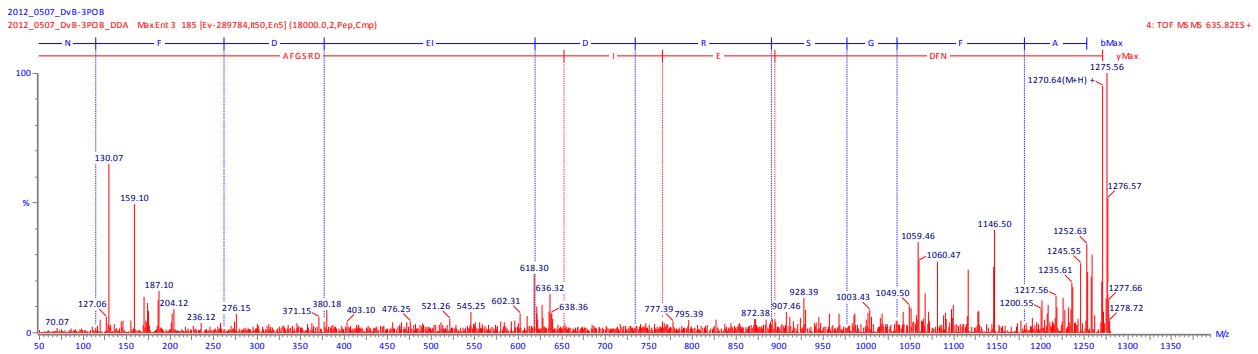

Orcokinin NFDEIDRSGFGF ( $m/z$  1403.6226)

MS/MS of  $m/z$  702.38 (PepSeq score = 480)

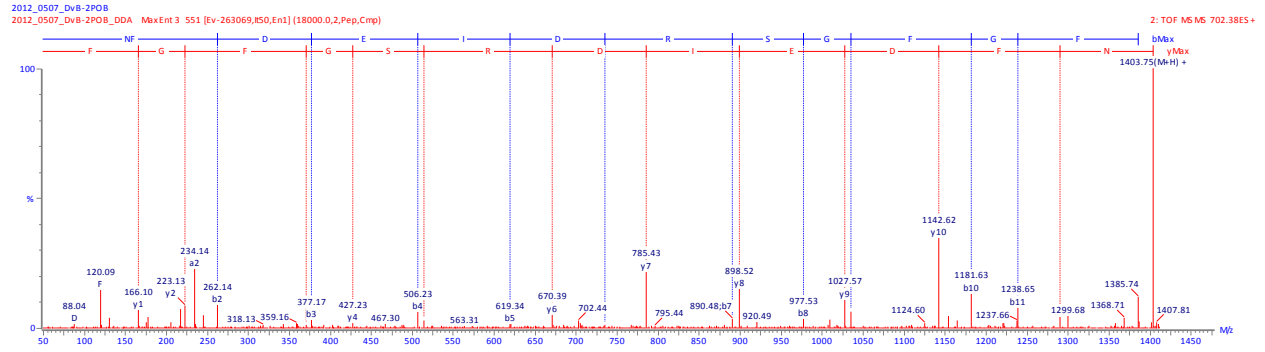

Orcokinin NFDEIDRSSFGF ( $m/z$  1433.6332)

MS/MS of  $m/z$  717.34 (PepSeq score = 354)

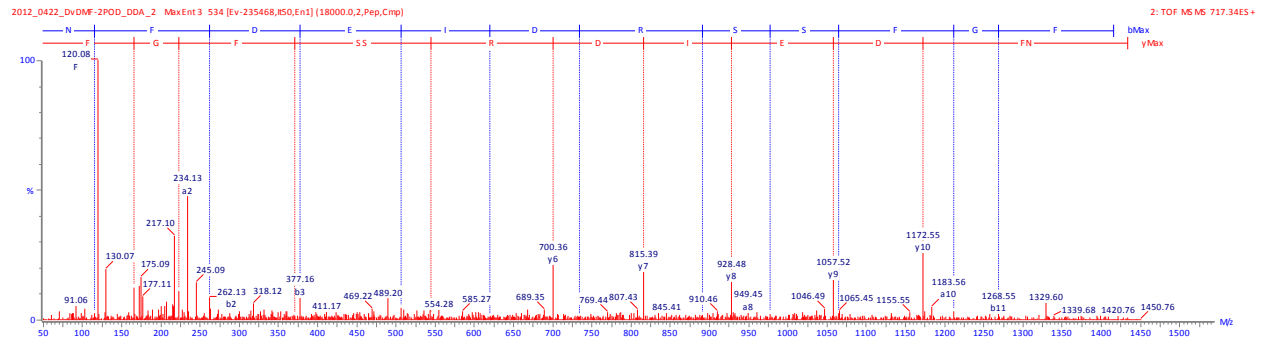

Orcokinin NFDEIDRSGFGFA ( $m/z$  1474.6597)

MS/MS of  $m/z$  737.86 (PepSeq score = 204)

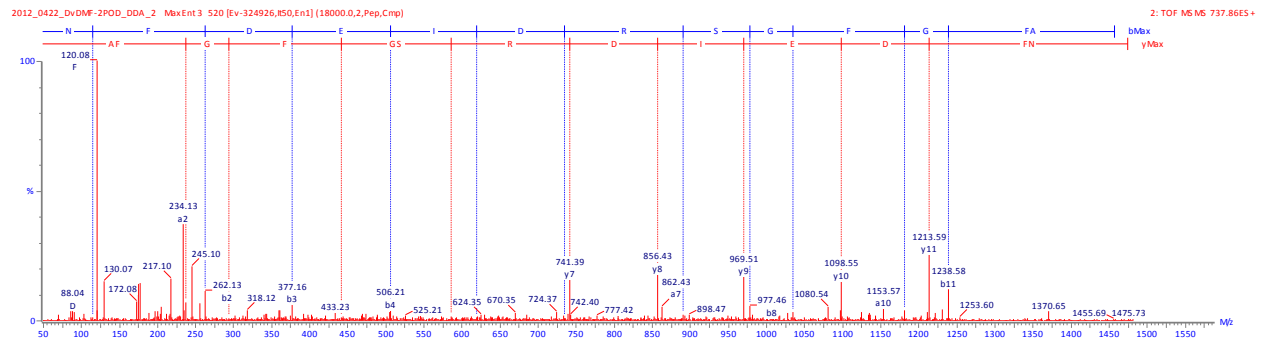

Orcokinin NFDEIDRSGFGFV ( $m/z$  1502.6910)

MS/MS of  $m/z$  751.87 (PepSeq score = 281)

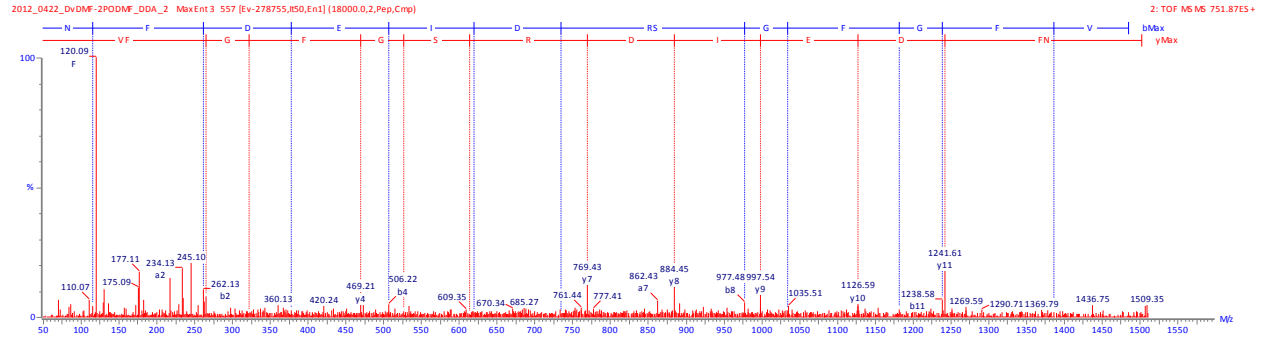

Orcokinin NFDEIDRSSFGFA ( $m/z$  1504.6703)

MS/MS of  $m/z$  752.89 (PepSeq score = 403)

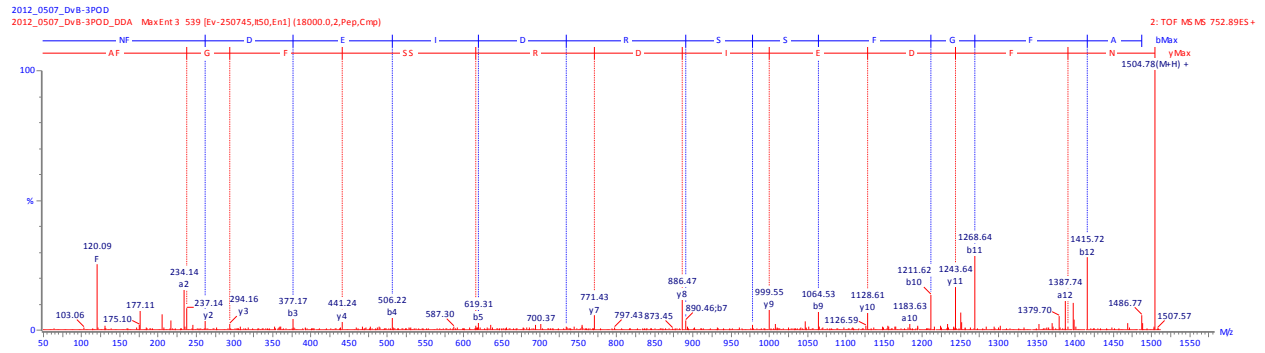

Orcokinin NFDEIDRSSFGFV ( $m/z$  1532.7016)

MS/MS of  $m/z$  766.91 (PepSeq score = 313)

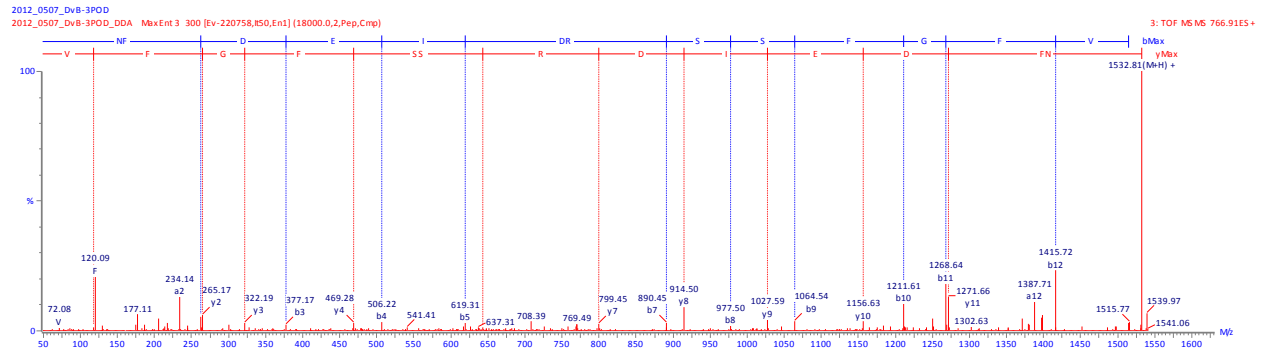

Orcokinin NFDEIDRSSFGFV ( $m/z$  1532.7016)

MS/MS of  $m/z$  766.91 (PepSeq score = 313)

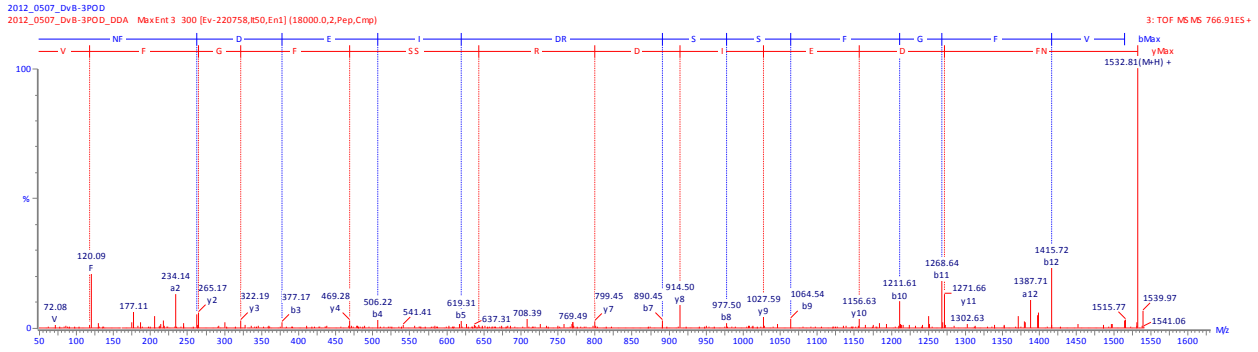

Orcokinin NFDEIDRSSFGFN ( $m/z$  1547.6815)

MS/MS of  $m/z$  774.37 (PepSeq score = 555)

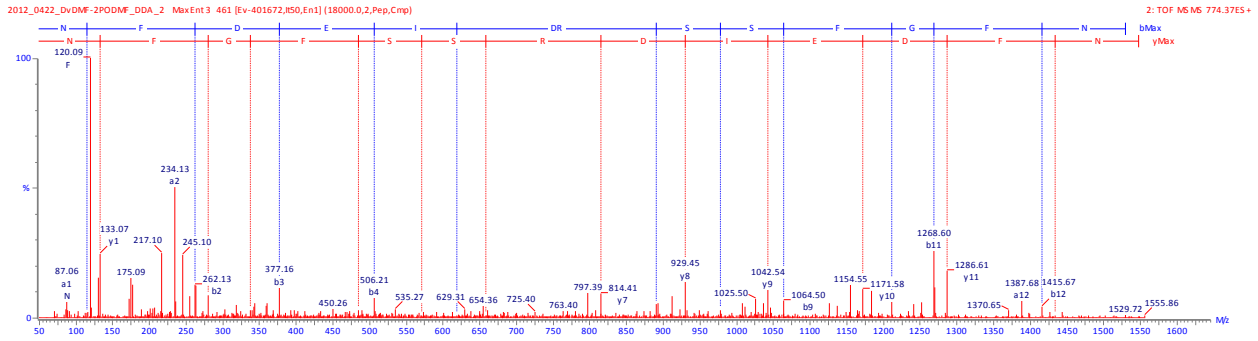

Other peptide: HLGSLKYRa ( $m/z$  844.4788)

MS/MS of  $m/z$  422.75 (PepSeq score = 11)

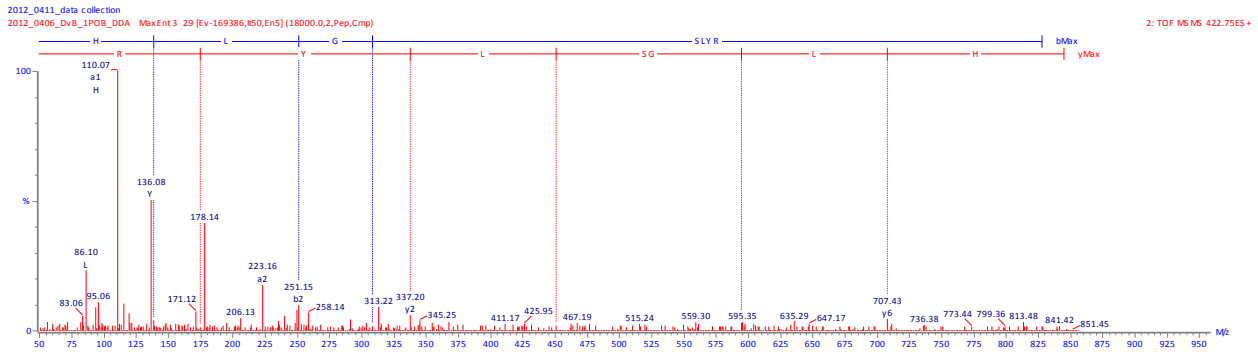



Proctolin RYLPT ( $m/z$  649.3668)

MS/MS of  $m/z$  325.20 (PepSeq score = 36)

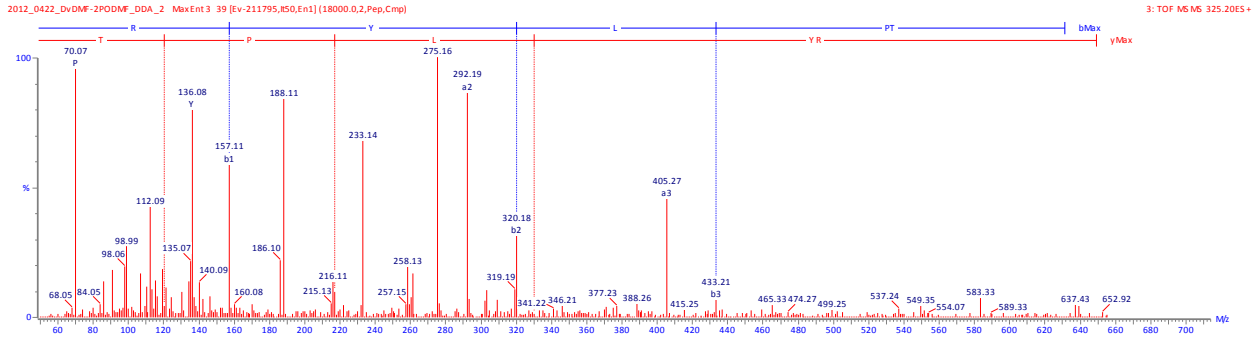

RYamide FVGGSRYa ( $m/z$  784.4101)

MS/MS of  $m/z$  392.75 (PepSeq score = 28)

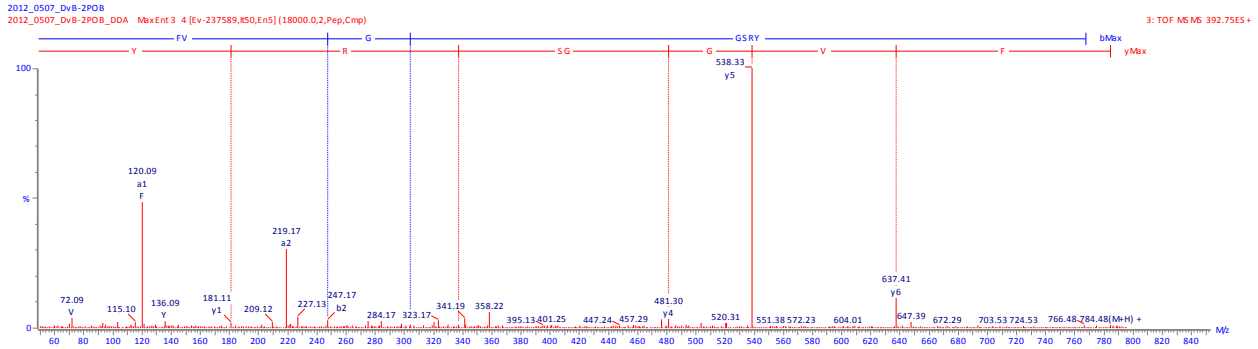

RYamide FVGGSRYa ( $m/z$  832.4101)

MS/MS of  $m/z$  416.74 (PepSeq score = 48)

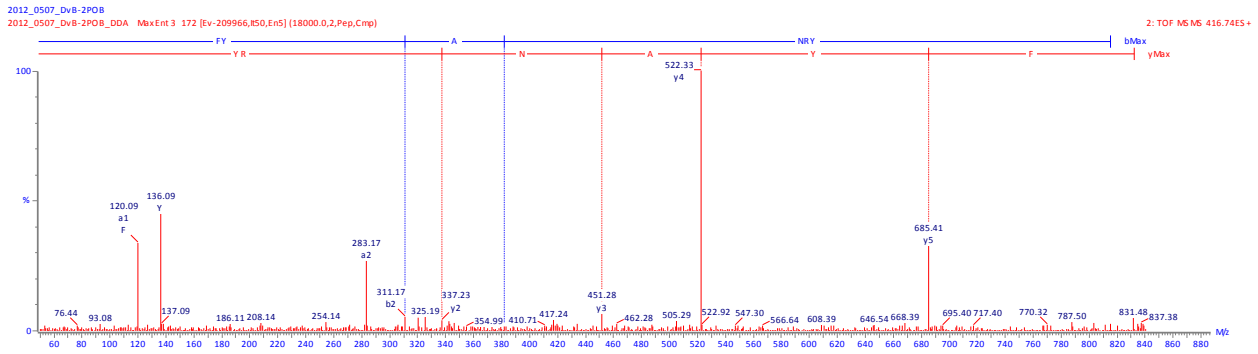

RYamide SGFYAPRYa ( $m/z$  959.4734)

MS/MS of  $m/z$  480.26 (PepSeq score = 47)

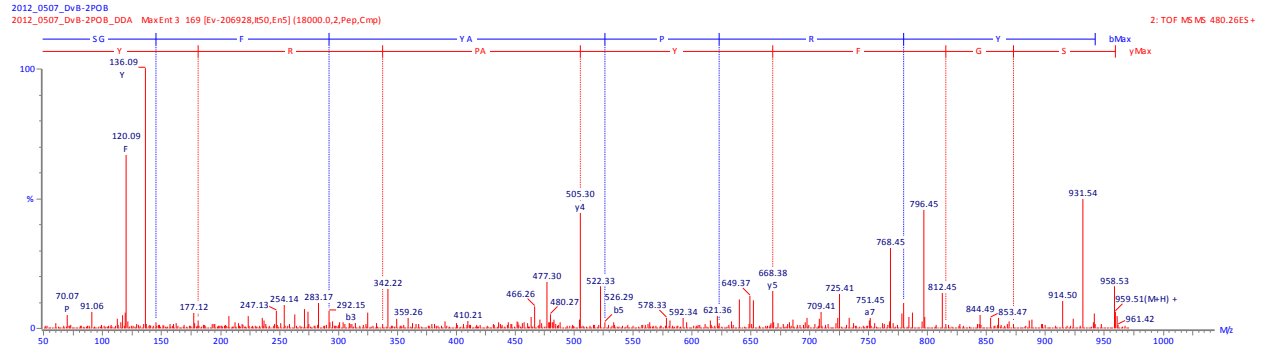

RYamide SGFYANRYa ( $m/z$  976.4734)

MS/MS of  $m/z$  488.75 (PepSeq score = 17)

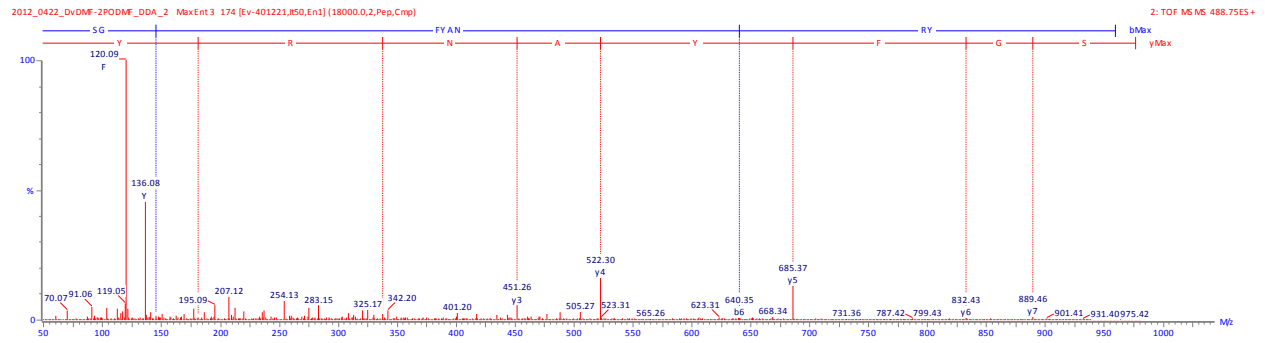

RYamide SRFVGGSRYa ( $m/z$  1027.5432)

MS/MS of  $m/z$  514.31 (PepSeq score = 26)

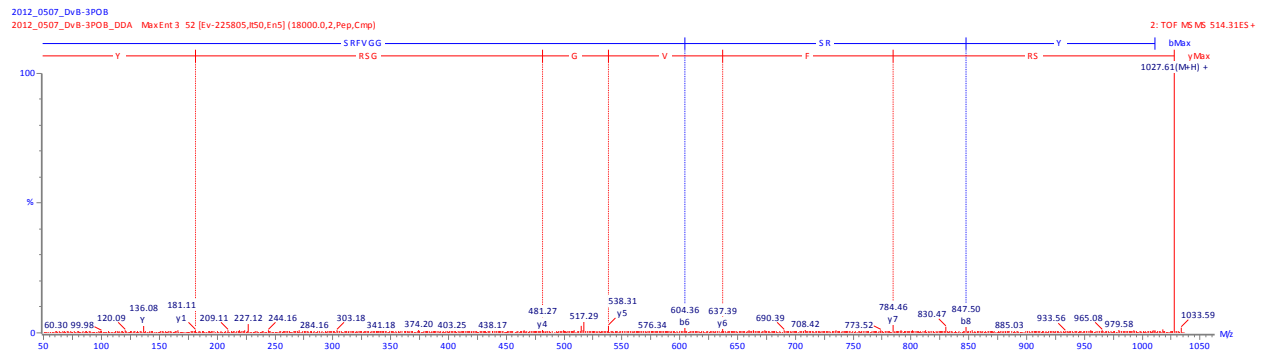

RYamide pEGFYSQRYa ( $m/z$  1030.4741)

MS/MS of  $m/z$  515.76 (PepSeq score = 32)

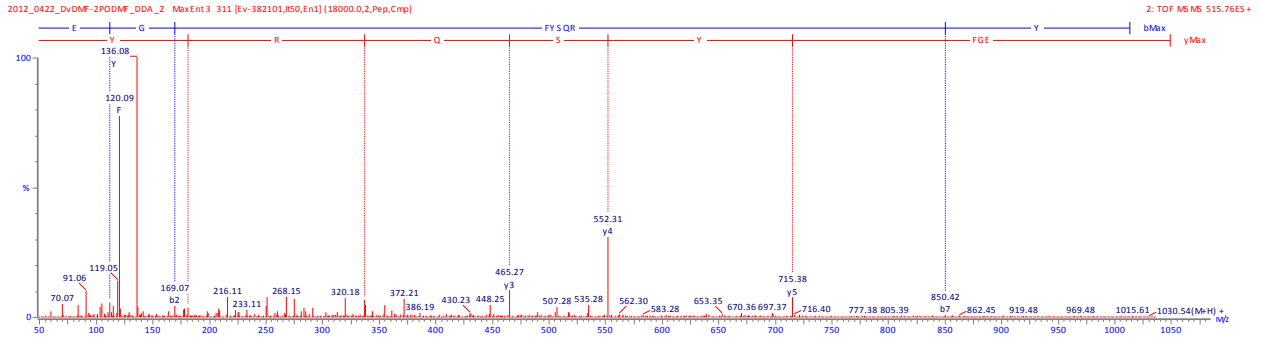

RYamide SSRFVGGSRYa ( $m/z$  1114.5752)

MS/MS of  $m/z$  557.81 (PepSeq score = 593)

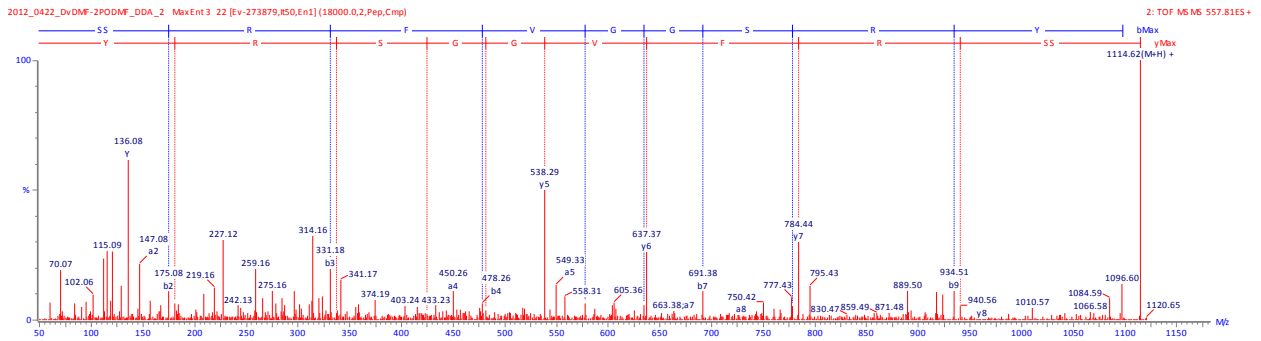

AST-B TGWNKFQGSWa ( $m/z$  1209.5800)

MS/MS of  $m/z$  605.35<sup>+2</sup> (PepSeq score = 278)

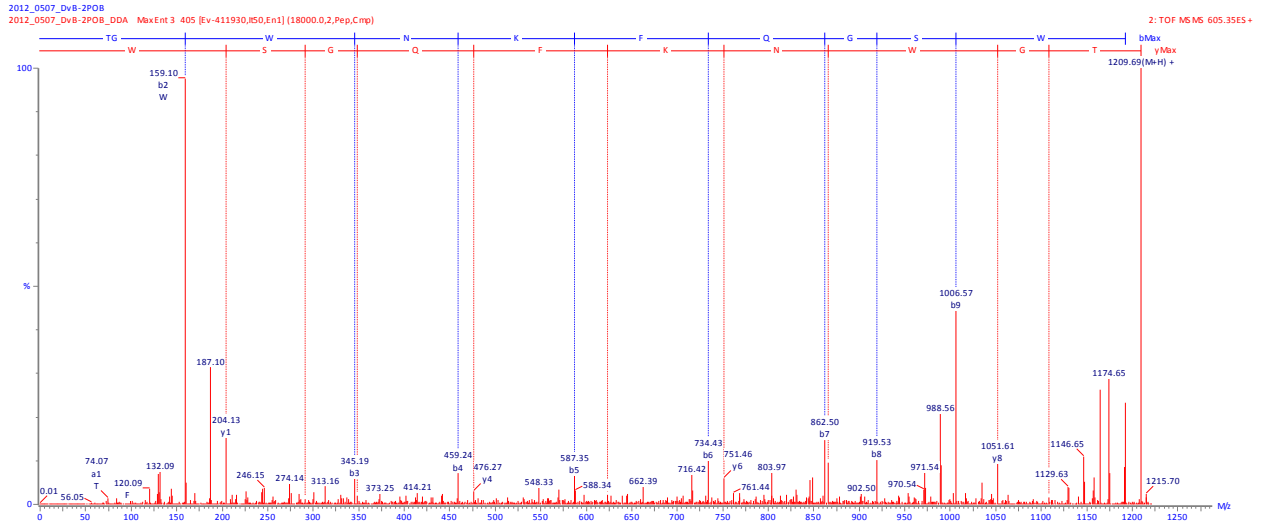

FLP-SKNYLRF ( $m/z$  926.5207)

MS/MS of  $m/z$  463.80<sup>+2</sup> (PepSeq score = 62)

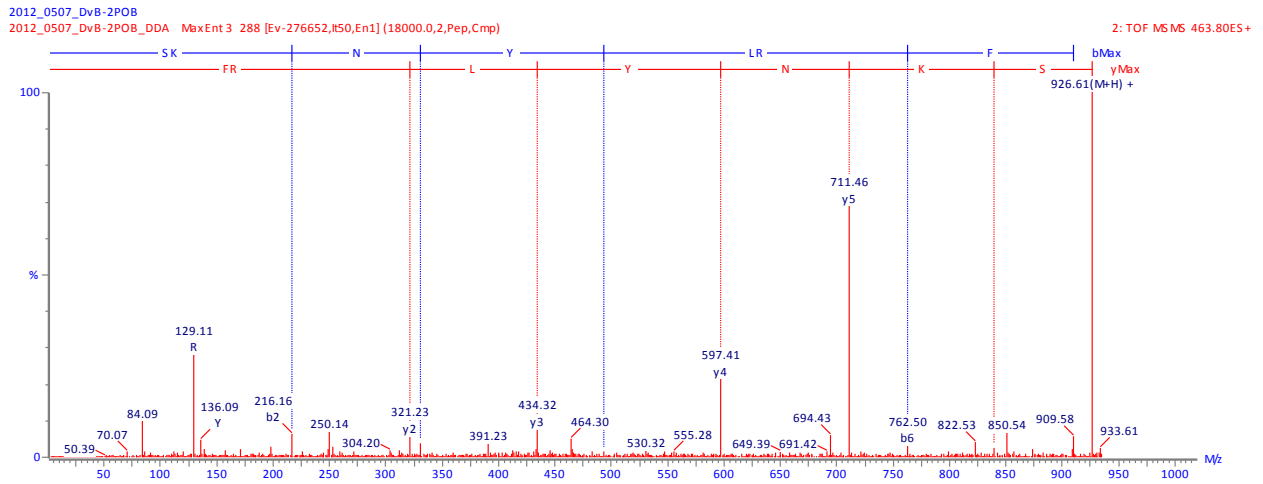

FLP-GAHKNYLRFa ( $m/z$  1104.6061)

MS/MS of  $m/z$  552.83<sup>2+</sup> (PepSeq score = 132)

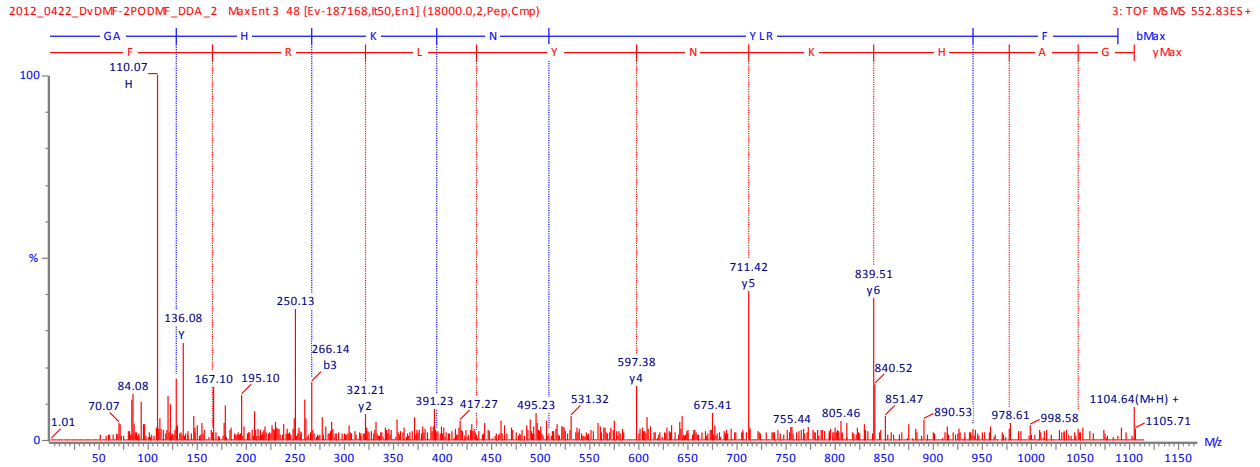

FLP-GAHKNYLRFa ( $m/z$  1104.6061)

MS/MS of  $m/z$  368.90<sup>3+</sup> (PepSeq score = 27)

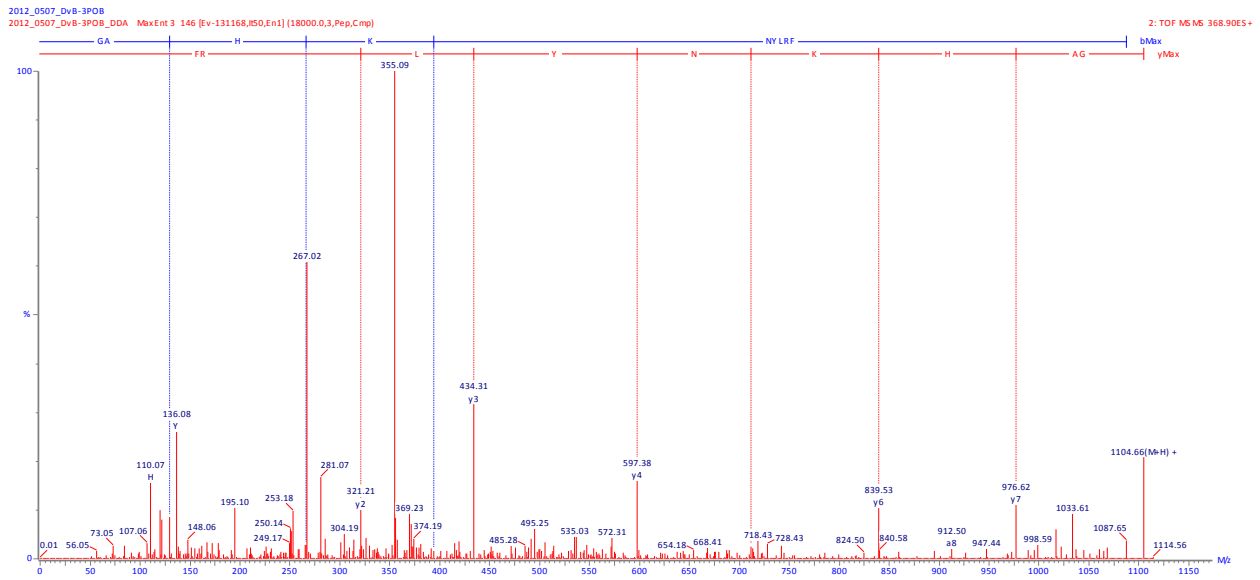

FLP-NRNFLRFa ( $m/z$  965.5428)

MS/MS of  $m/z$  483.31<sup>2+</sup> (PepSeq score = 53)

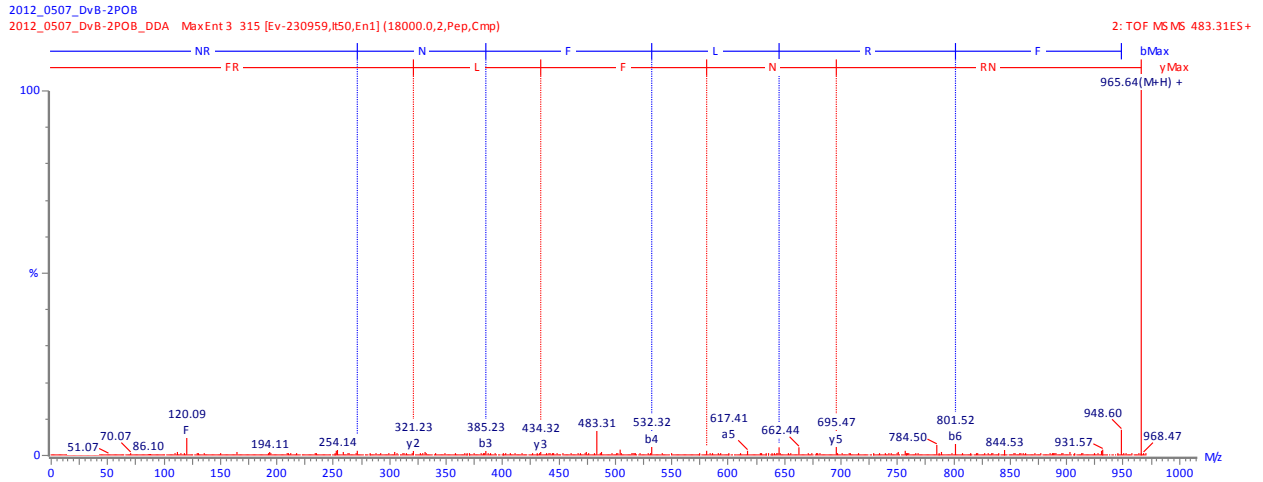

FLP-DRNFLRFa ( $m/z$  966.5268)

MS/MS of  $m/z$  483.78<sup>2+</sup> (PepSeq score = 135)

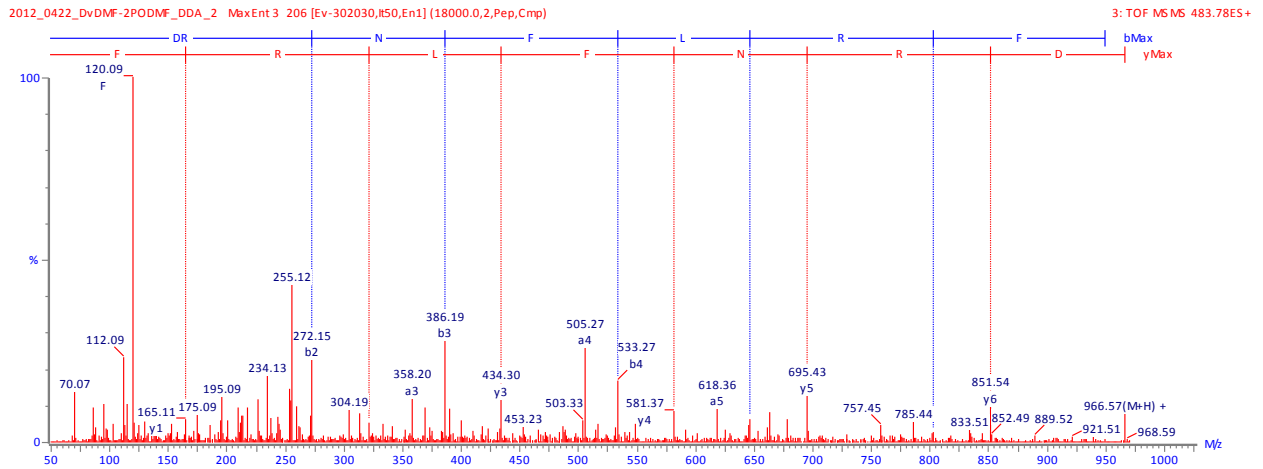

FLP-GNRRNFLRFa ( $m/z$  1022.5646)

MS/MS of  $m/z$  511.80<sup>2+</sup> (PepSeq score = 2)

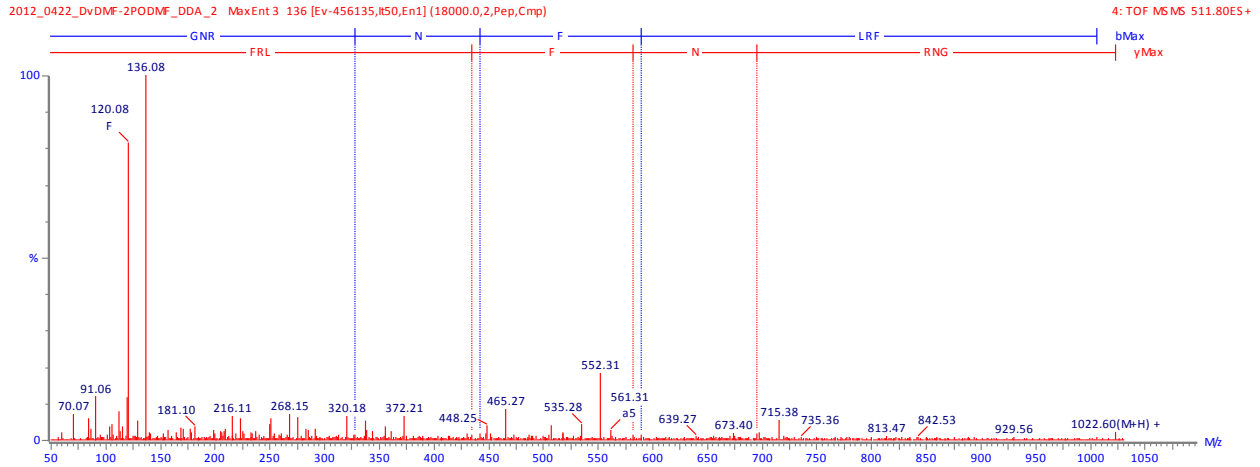

FLP-GLSRNYLRFa ( $m/z$  1124.6323)

MS/MS of  $m/z$  562.82<sup>2+</sup> (PepSeq score = 47)

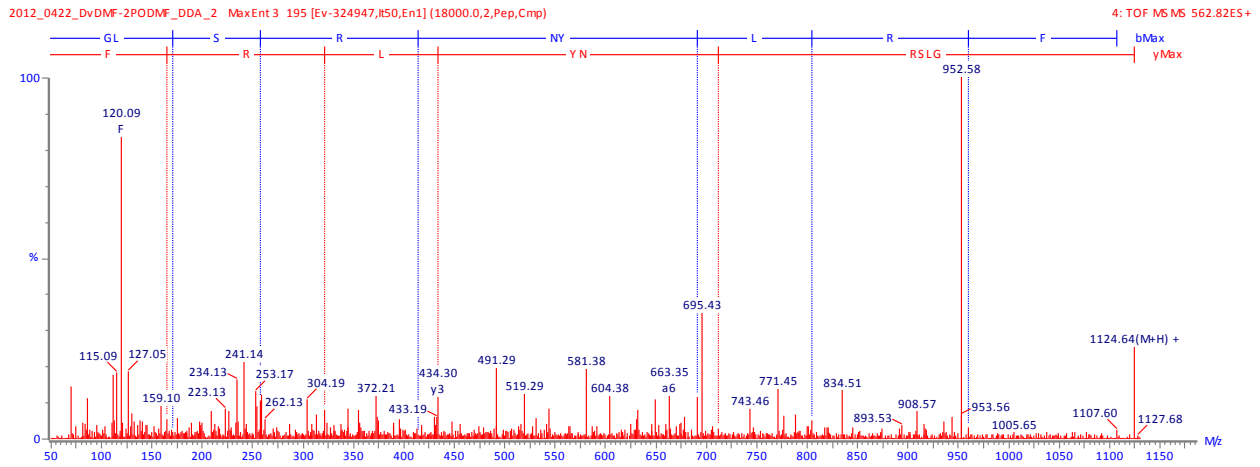

FLP-GYSKNYLRFa ( $m/z$  1146.6055)

MS/MS of  $m/z$  573.82<sup>2+</sup> (PepSeq score = 73)

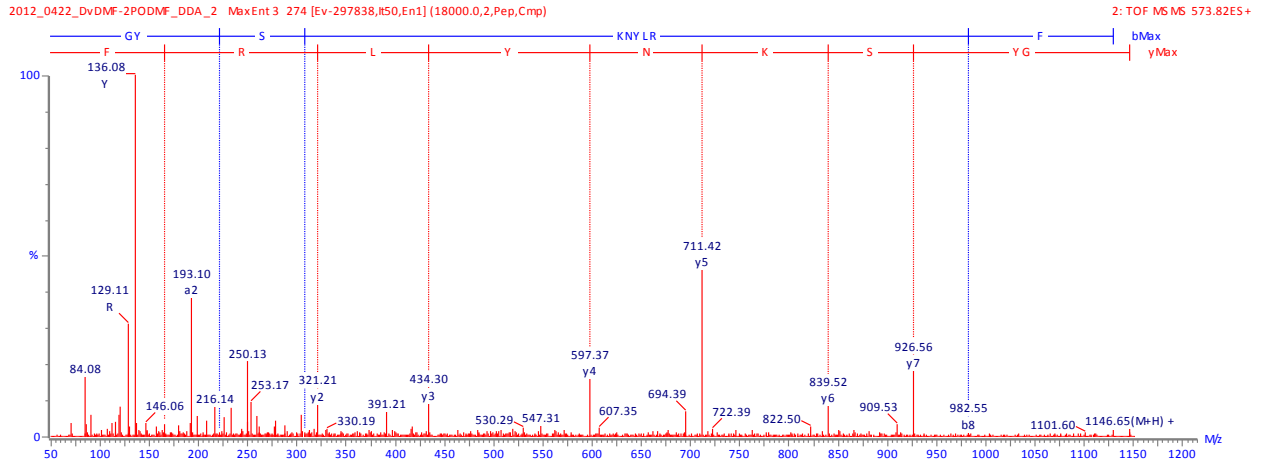

FLP-APQRNFLRFa ( $m/z$  1147.6483)

MS/MS of  $m/z$  574.3242<sup>2+</sup> (PepSeq score = 259)

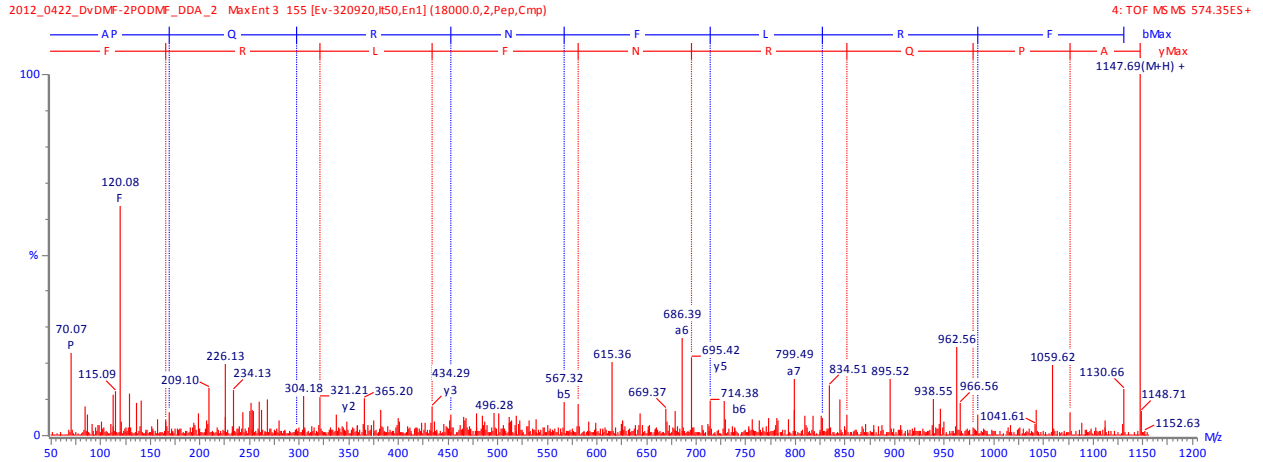



FLP-YGNRSFLRFa ( $m/z$  1158.6167)

MS/MS of  $m/z$  579.82<sup>2+</sup> (PepSeq score = 142)

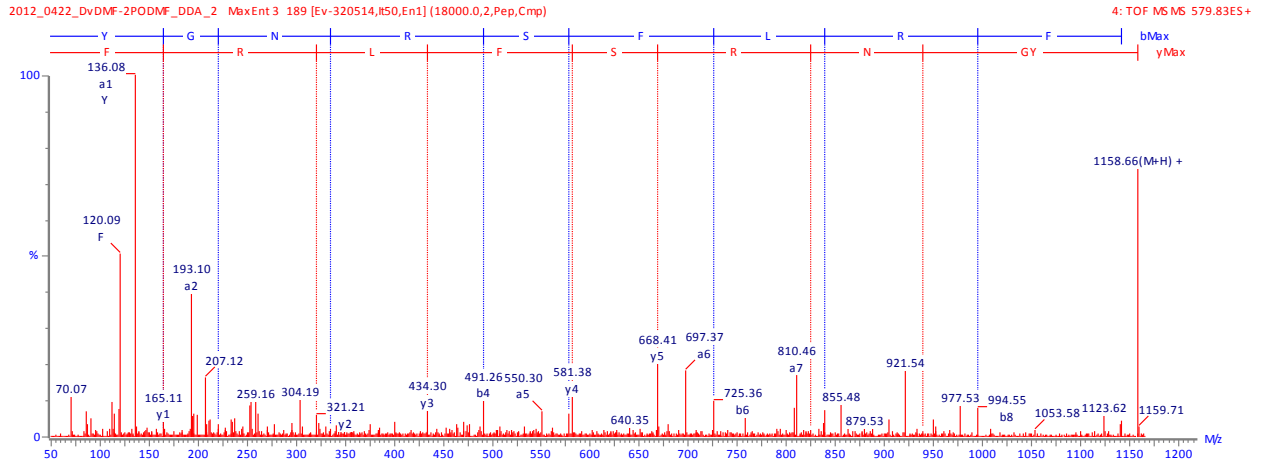

**MATRIX SCIENCE** Mascot Search Results

Peptide View

MS/MS Fragmentation of **RSAEGLGRMGRLASLKSDVTPLRGFEGETGHPLE**

Found in **LL380**, CPRP\_(CHH\_precursor-related\_peptide)

\_Casap\_CPRP\_RSAEGLGRMGRLASLKSDVTPLRGFEGETGHPLE\_3838.00280\_Csap\_SG

Match to Query 1093: 3837.030120 from(768.413300,5+) intensity(2450831.2000) index(309)

Data file C:\Users\llilabadmin\Desktop\fast dvdmf\2012\_0422\_DvDMF-2PODMF\_DDA\_2\_CID.pkl

Click mouse within plot area to zoom in by factor of two about that point

Or, Plot from 0 to 4000 Da Full range

Label all possible matches Label matches used for scoring

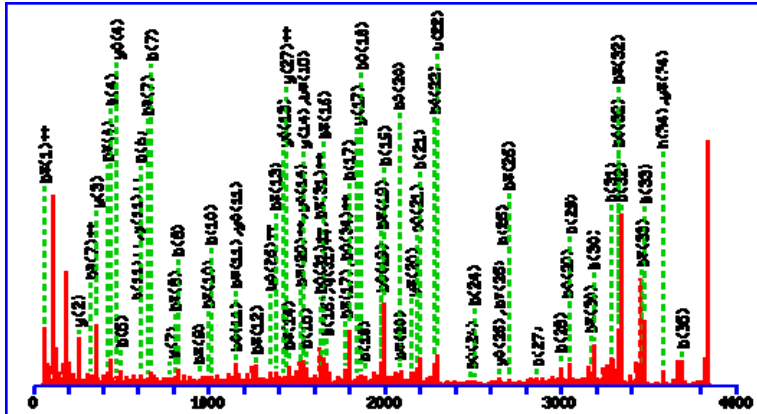

Monoisotopic mass of neutral peptide Mr(calc): 3836.9955

Ions Score: 109 Expect: 5.8e-011

Matches : 75/396 fragment ions using 152 most intense peaks (help)

| #  | b         | b <sup>++</sup> | b*        | b <sup>++</sup> * | b <sup>0</sup> | b <sup>0++</sup> | Seq. | y         | y <sup>++</sup> | y*        | y <sup>++</sup> * | y <sup>0</sup> | y <sup>0++</sup> | #  |
|----|-----------|-----------------|-----------|-------------------|----------------|------------------|------|-----------|-----------------|-----------|-------------------|----------------|------------------|----|
| 1  | 157.1084  | 79.0578         | 140.0818  | 70.5446           |                |                  | R    |           |                 |           |                   |                |                  | 36 |
| 2  | 244.1404  | 122.5738        | 227.1139  | 114.0606          | 226.1298       | 113.5686         | S    | 3681.9017 | 1841.4545       | 3664.8752 | 1832.9412         | 3663.8912      | 1832.4492        | 35 |
| 3  | 315.1775  | 158.0924        | 298.1510  | 149.5791          | 297.1670       | 149.0871         | A    | 3594.8697 | 1797.9385       | 3577.8431 | 1789.4252         | 3576.8591      | 1788.9332        | 34 |
| 4  | 444.2201  | 222.6137        | 427.1936  | 214.1004          | 426.2096       | 213.6084         | E    | 3523.8326 | 1762.4199       | 3506.8060 | 1753.9067         | 3505.8220      | 1753.4146        | 33 |
| 5  | 501.2416  | 251.1244        | 484.2150  | 242.6112          | 483.2310       | 242.1191         | G    | 3394.7900 | 1697.8986       | 3377.7634 | 1689.3854         | 3376.7794      | 1688.8933        | 32 |
| 6  | 614.3257  | 307.6665        | 597.2991  | 299.1532          | 596.3151       | 298.6612         | L    | 3337.7685 | 1669.3879       | 3320.7420 | 1660.8746         | 3319.7580      | 1660.3826        | 31 |
| 7  | 671.3471  | 336.1772        | 654.3206  | 327.6639          | 653.3365       | 327.1719         | G    | 3224.6845 | 1612.8459       | 3207.6579 | 1604.3326         | 3206.6739      | 1603.8406        | 30 |
| 8  | 827.4482  | 414.2278        | 810.4217  | 405.7145          | 809.4377       | 405.2225         | R    | 3167.6630 | 1584.3351       | 3150.6364 | 1575.8219         | 3149.6524      | 1575.3299        | 29 |
| 9  | 958.4887  | 479.7480        | 941.4622  | 471.2347          | 940.4781       | 470.7427         | M    | 3011.5619 | 1506.2846       | 2994.5353 | 1497.7713         | 2993.5513      | 1497.2793        | 28 |
| 10 | 1015.5102 | 508.2587        | 998.4836  | 499.7455          | 997.4996       | 499.2534         | G    | 2880.5214 | 1440.7643       | 2863.4948 | 1432.2511         | 2862.5108      | 1431.7591        | 27 |
| 11 | 1171.6113 | 586.3093        | 1154.5847 | 577.7960          | 1153.6007      | 577.3040         | R    | 2823.4999 | 1412.2536       | 2806.4734 | 1403.7403         | 2805.4894      | 1403.2483        | 26 |
| 12 | 1284.6953 | 642.8513        | 1267.6688 | 634.3380          | 1266.6848      | 633.8460         | L    | 2667.3988 | 1334.2030       | 2650.3723 | 1325.6898         | 2649.3883      | 1325.1978        | 25 |
| 13 | 1397.7794 | 699.3933        | 1380.7529 | 690.8801          | 1379.7688      | 690.3881         | L    | 2554.3148 | 1277.6610       | 2537.2882 | 1269.1477         | 2536.3042      | 1268.6557        | 24 |
| 14 | 1468.8165 | 734.9119        | 1451.7900 | 726.3986          | 1450.8060      | 725.9066         | A    | 2441.2307 | 1221.1190       | 2424.2041 | 1212.6057         | 2423.2201      | 1212.1137        | 23 |
| 15 | 1555.8486 | 778.4279        | 1538.8220 | 769.9146          | 1537.8380      | 769.4226         | S    | 2370.1936 | 1185.6004       | 2353.1670 | 1177.0872         | 2352.1830      | 1176.5951        | 22 |
| 16 | 1668.9326 | 834.9699        | 1651.9061 | 826.4567          | 1650.9221      | 825.9647         | L    | 2283.1616 | 1142.0844       | 2266.1350 | 1133.5711         | 2265.1510      | 1133.0791        | 21 |
| 17 | 1797.0276 | 899.0174        | 1780.0010 | 890.5042          | 1779.0170      | 890.0121         | K    | 2170.0775 | 1085.5424       | 2153.0509 | 1077.0291         | 2152.0669      | 1076.5371        | 20 |
| 18 | 1884.0596 | 942.5334        | 1867.0331 | 934.0202          | 1866.0490      | 933.5282         | S    | 2041.9825 | 1021.4949       | 2024.9560 | 1012.9816         | 2023.9720      | 1012.4896        | 19 |
| 19 | 1999.0866 | 1000.0469       | 1982.0600 | 991.5336          | 1981.0760      | 991.0416         | D    | 1954.9505 | 977.9789        | 1937.9239 | 969.4656          | 1936.9399      | 968.9736         | 18 |
| 20 | 2100.1342 | 1050.5708       | 2083.1077 | 1042.0575         | 2082.1237      | 1041.5655        | T    | 1839.9236 | 920.4654        | 1822.8970 | 911.9521          | 1821.9130      | 911.4601         | 17 |
| 21 | 2199.2026 | 1100.1050       | 2182.1761 | 1091.5917         | 2181.1921      | 1091.0997        | V    | 1738.8759 | 869.9416        | 1721.8493 | 861.4283          | 1720.8653      | 860.9363         | 16 |
| 22 | 2300.2503 | 1150.6288       | 2283.2238 | 1142.1155         | 2282.2398      | 1141.6235        | T    | 1639.8075 | 820.4074        | 1622.7809 | 811.8941          | 1621.7969      | 811.4021         | 15 |
| 23 | 2397.3031 | 1199.1552       | 2380.2765 | 1190.6419         | 2379.2925      | 1190.1499        | P    | 1538.7598 | 769.8835        | 1521.7332 | 761.3703          | 1520.7492      | 760.8782         | 14 |
| 24 | 2510.3872 | 1255.6972       | 2493.3606 | 1247.1839         | 2492.3766      | 1246.6919        | L    | 1441.7070 | 721.3571        | 1424.6805 | 712.8439          | 1423.6965      | 712.3519         | 13 |
| 25 | 2666.4883 | 1333.7478       | 2649.4617 | 1325.2345         | 2648.4777      | 1324.7425        | R    | 1328.6230 | 664.8151        | 1311.5964 | 656.3018          | 1310.6124      | 655.8098         | 12 |

|    |           |           |           |           |           |           |   |           |          |  |  |           |          |    |
|----|-----------|-----------|-----------|-----------|-----------|-----------|---|-----------|----------|--|--|-----------|----------|----|
| 26 | 2723.5097 | 1362.2585 | 2706.4832 | 1353.7452 | 2705.4992 | 1353.2532 | G | 1172.5218 | 586.7646 |  |  | 1154.5113 | 577.7593 | 11 |
| 27 | 2870.5781 | 1435.7927 | 2853.5516 | 1427.2794 | 2852.5676 | 1426.7874 | F | 1115.5004 | 558.2538 |  |  | 1097.4898 | 549.2485 | 10 |
| 28 | 2999.6207 | 1500.3140 | 2982.5942 | 1491.8007 | 2981.6102 | 1491.3087 | E | 968.4320  | 484.7196 |  |  | 950.4214  | 475.7143 | 9  |
| 29 | 3056.6422 | 1528.8247 | 3039.6156 | 1520.3115 | 3038.6316 | 1519.8195 | G | 839.3894  | 420.1983 |  |  | 821.3788  | 411.1930 | 8  |
| 30 | 3185.6848 | 1593.3460 | 3168.6582 | 1584.8328 | 3167.6742 | 1584.3408 | E | 782.3679  | 391.6876 |  |  | 764.3573  | 382.6823 | 7  |
| 31 | 3286.7325 | 1643.8699 | 3269.7059 | 1635.3566 | 3268.7219 | 1634.8646 | T | 653.3253  | 327.1663 |  |  | 635.3148  | 318.1610 | 6  |
| 32 | 3343.7539 | 1672.3806 | 3326.7274 | 1663.8673 | 3325.7434 | 1663.3753 | G | 552.2776  | 276.6425 |  |  | 534.2671  | 267.6372 | 5  |
| 33 | 3480.8128 | 1740.9101 | 3463.7863 | 1732.3968 | 3462.8023 | 1731.9048 | H | 495.2562  | 248.1317 |  |  | 477.2456  | 239.1264 | 4  |
| 34 | 3577.8656 | 1789.4364 | 3560.8391 | 1780.9232 | 3559.8550 | 1780.4312 | P | 358.1973  | 179.6023 |  |  | 340.1867  | 170.5970 | 3  |
| 35 | 3690.9497 | 1845.9785 | 3673.9231 | 1837.4652 | 3672.9391 | 1836.9732 | L | 261.1445  | 131.0759 |  |  | 243.1339  | 122.0706 | 2  |
| 36 |           |           |           |           |           |           | E | 148.0604  | 74.5339  |  |  | 130.0499  | 65.5286  | 1  |

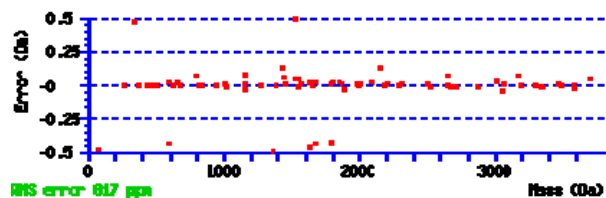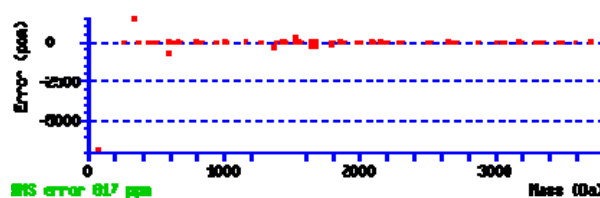

NCBI BLAST search of [RSAEGLGRMGRLASLKS DVTVPLRGFEGETGHPLE](#)

(Parameters: blastp, nr protein database, expect=20000, no filter, PAM30)

Other BLAST [web gateways](#)

All matches to this query

| Score | Mr(calc): | Delta  | Sequence                                             |
|-------|-----------|--------|------------------------------------------------------|
| 109.1 | 3836.9955 | 0.0346 | <a href="#">RSAEGLGRMGRLASLKS DVTVPLRGFEGETGHPLE</a> |

Mascot: <http://www.matrixscience.com/>
